# Supplementary material for: Visible-light-mediated regioselective synthesis of novel thiazolo[3,2-b][1,2,4]triazoles: advantageous synthetic application of aqueous conditions
Source: Royal Society of Chemistry journal article supplement (doi:10.1039/d1ob02194j), 2021-12-14
Supplement: d1ob02194j1.pdf [file d1ob02194j1.pdf]

## SUPPLEMENTARY DATA

for

### Visible-light-mediated Regioselective Synthesis of Novel Thiazolo[3,2-*b*][1,2,4]triazoles: Advantageous Synthetic Application of Aqueous Conditions

Ranjana Aggarwal,<sup>a,b\*</sup> Mona Hooda,<sup>a</sup> Prince Kumar,<sup>a</sup> Mari Carmen Torralba<sup>c</sup>

<sup>a</sup>Department of Chemistry, Kurukshetra University, Kurukshetra-136119, Haryana, India

<sup>b</sup>Council of Scientific and Industrial Research-National Institute of Science Communication  
and Policy Research, New Delhi 110012, India

<sup>c</sup>Departamento de Química Inorgánica, Facultad de Ciencias Químicas, Universidad  
Complutense de Madrid (UCM), E-28040, Madrid, Spain

\*Corresponding author:

Prof. Ranjana Aggarwal, CSIR-National Institute of Science Communication and Policy  
Research, New Delhi, India. Tel: +91-9896740740

E-mails: [ranjana67in@yahoo.com](mailto:ranjana67in@yahoo.com), [ranjanaaggarwal67@gmail.com](mailto:ranjanaaggarwal67@gmail.com)

## TABLE of CONTENT

|                                                                                                                      | Page no. |
|----------------------------------------------------------------------------------------------------------------------|----------|
| <b>General synthesis</b>                                                                                             | S3       |
| <b>Characterization of Final Compounds</b>                                                                           |          |
| <sup>1</sup> H NMR, <sup>13</sup> C NMR, HMBC, and<br>HMQC of final compounds<br><b>Figures S1-S18, Tables S1-S2</b> | S4-S27   |
| HRMS spectra<br><b>Figures S19-21</b>                                                                                | S28-S29  |
| X-ray analytical data<br><b>Tables S3-S4</b>                                                                         | S30-S31  |

**General method for preparation of (2-aryl'-6-methylthiazolo[3,2-*b*][1,2,4]triazol-5-yl)(aryl)methanone (6)**

To a stirred solution of 1,3-diketone (1.0 eq) in distilled water, 0.178 g of NBS (1.0 eq) was added under visible-light irradiations. Reaction contents were allowed to stir for about 15 minutes. Subsequently, 3-mercapto-1,2,4-triazole (1.0 eq) was added to the reaction mixture and stirred for further 30-40 minutes under the same reaction conditions till the finishing point monitored on TLC. Excess water was distilled off under reduced pressure using a rotatory evaporator; the reaction product was neutralized with an aqueous solution of sodium bicarbonate and extracted with ethyl acetate. Solid obtained after evaporation of ethyl acetate was recrystallized with ethanol, filtered and dried to obtain the product in 73-94% yields.

# Characterization of Final Compounds

## <sup>1</sup>H NMR, <sup>13</sup>C NMR, HMQC, HMBC Data of Final Compounds

### 1. (6-methyl-2-phenylthiazolo[3,2-b][1,2,4]triazol-5-yl)(phenyl)methanone (6a)

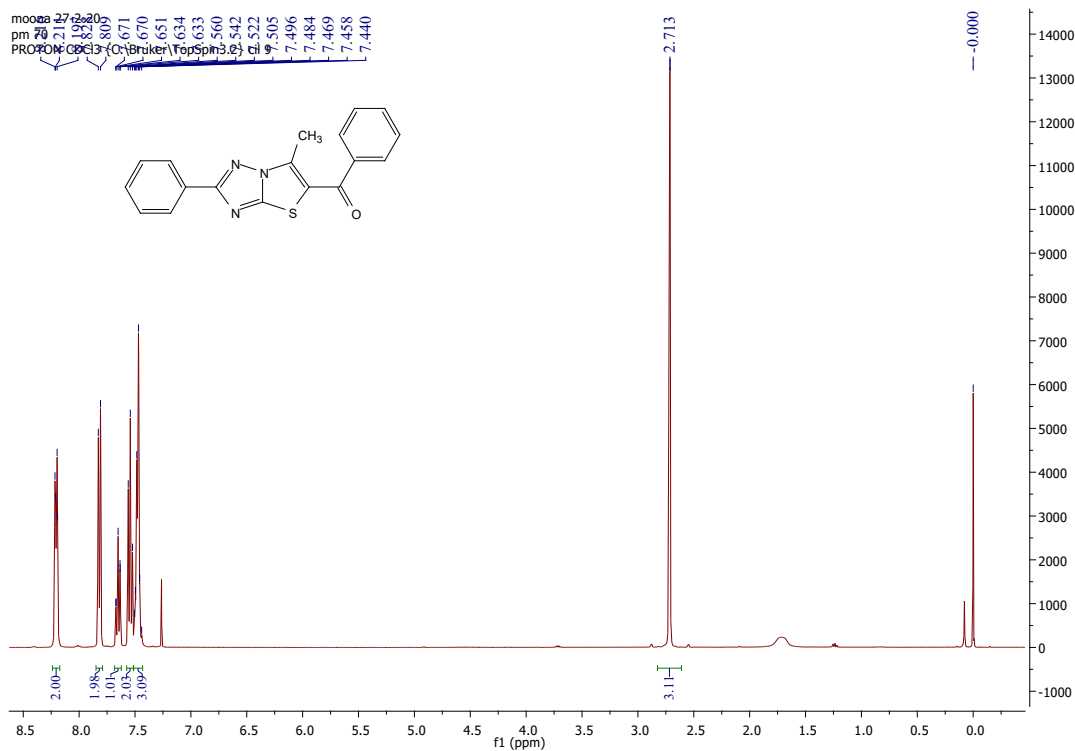

Figure S1a. <sup>1</sup>H NMR spectrum of 6a

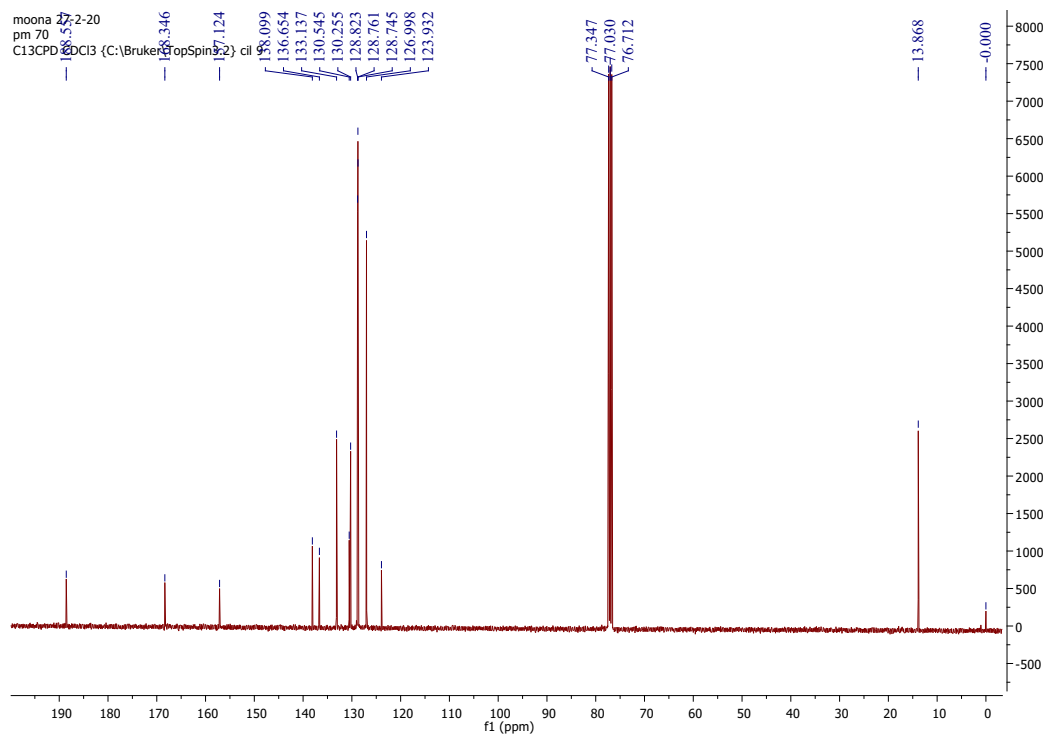

Figure S1b. <sup>13</sup>C NMR spectrum of 6a

2. (4-fluorophenyl)(6-methyl-2-phenylthiazolo[3,2-b][1,2,4]triazol-5-yl)methanone  
(6b)

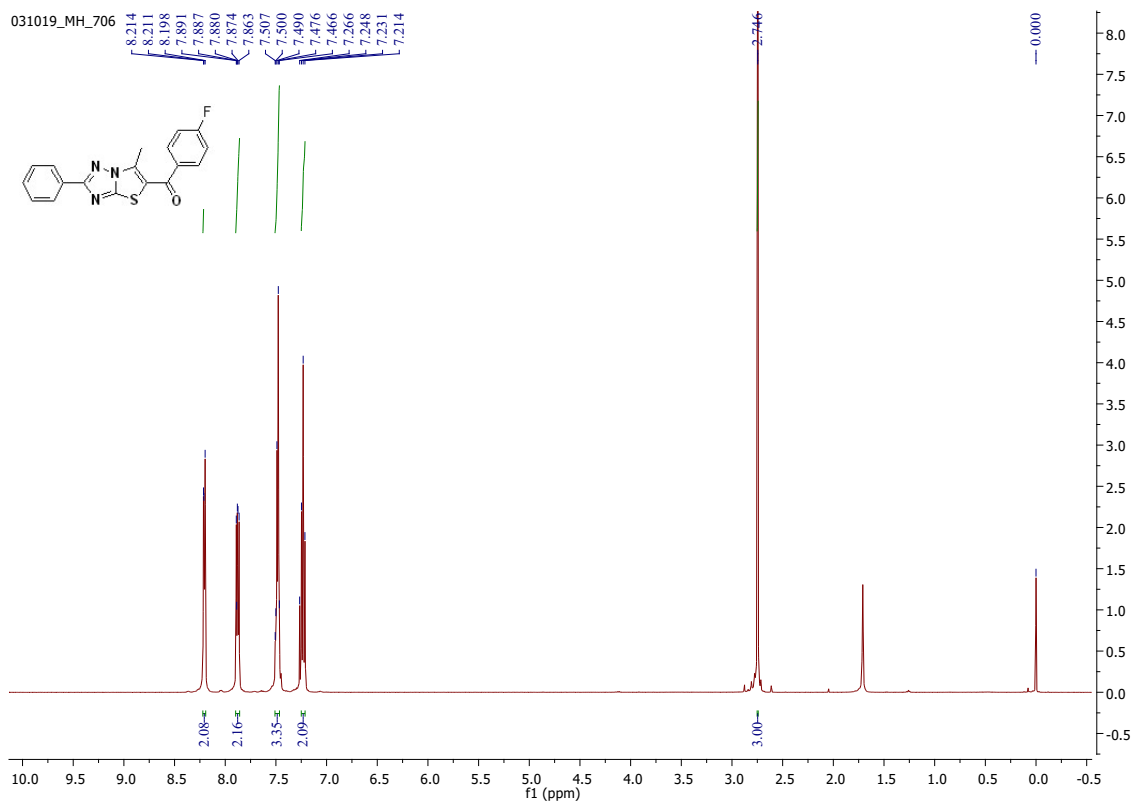

Figure S2a. <sup>1</sup>H NMR spectrum of 6b

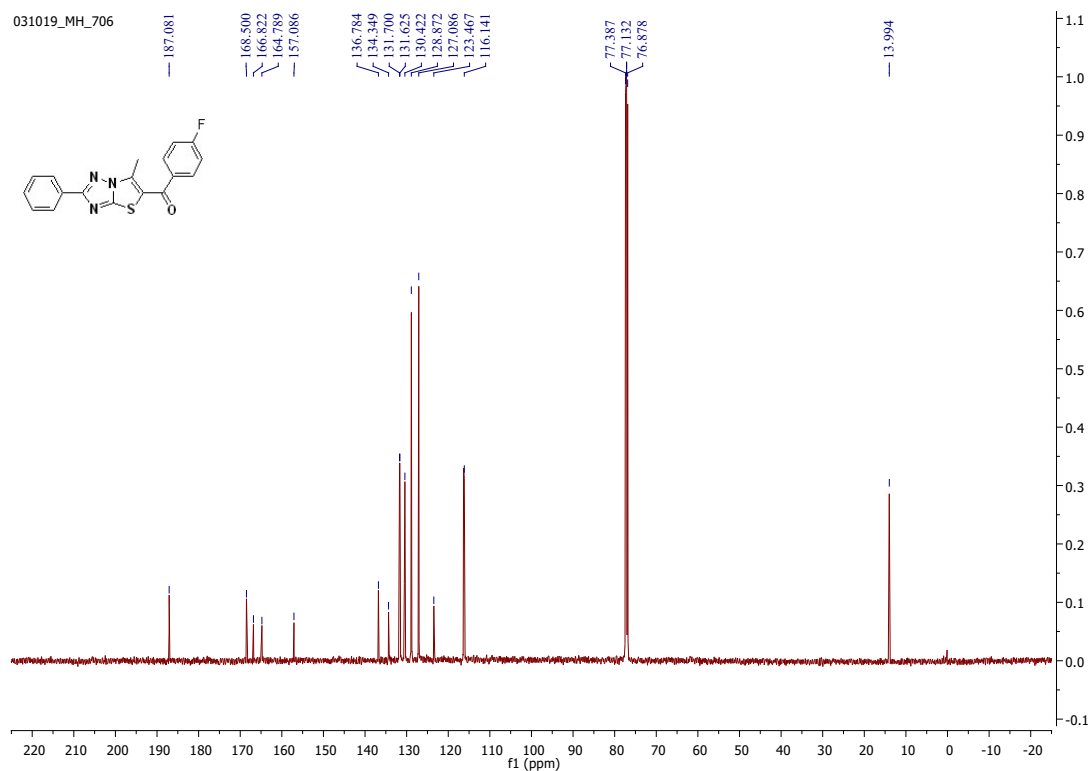

Figure S2b. <sup>13</sup>C NMR spectrum of 6b

031019\_MH\_706

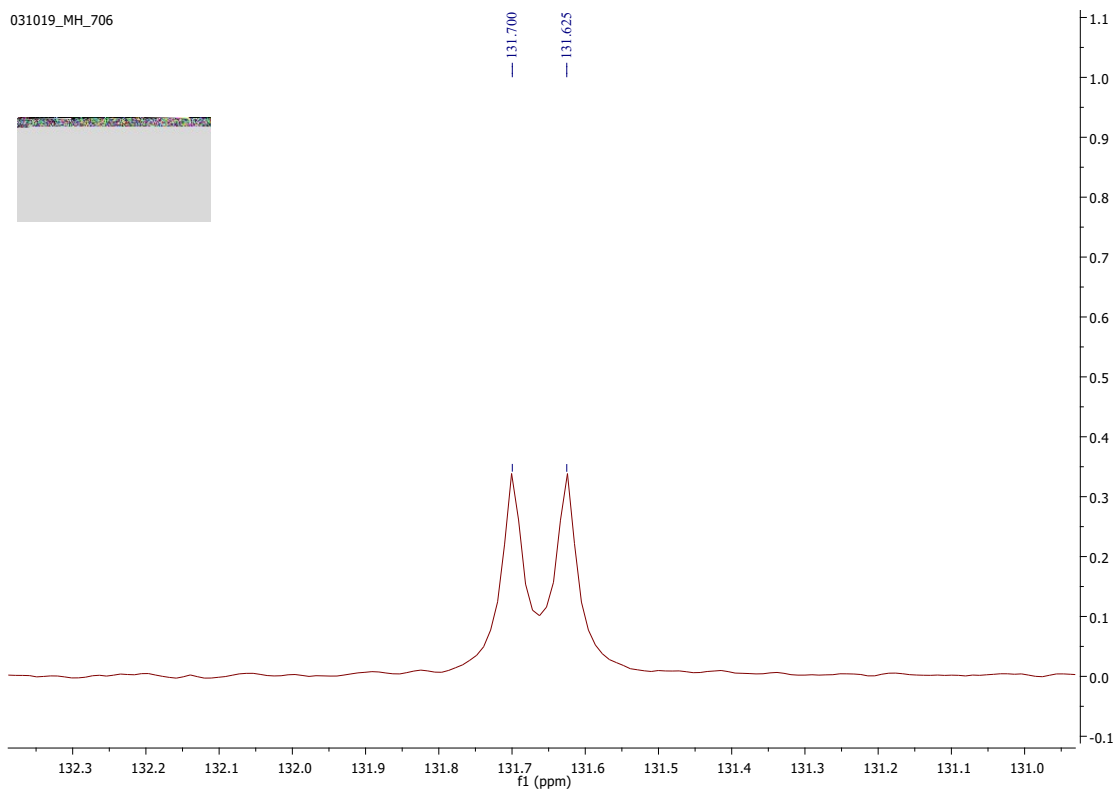

**Figure S2c.** Zoom  $^{13}\text{C}$  NMR spectrum of **6b**

PS-706  
single\_pulse

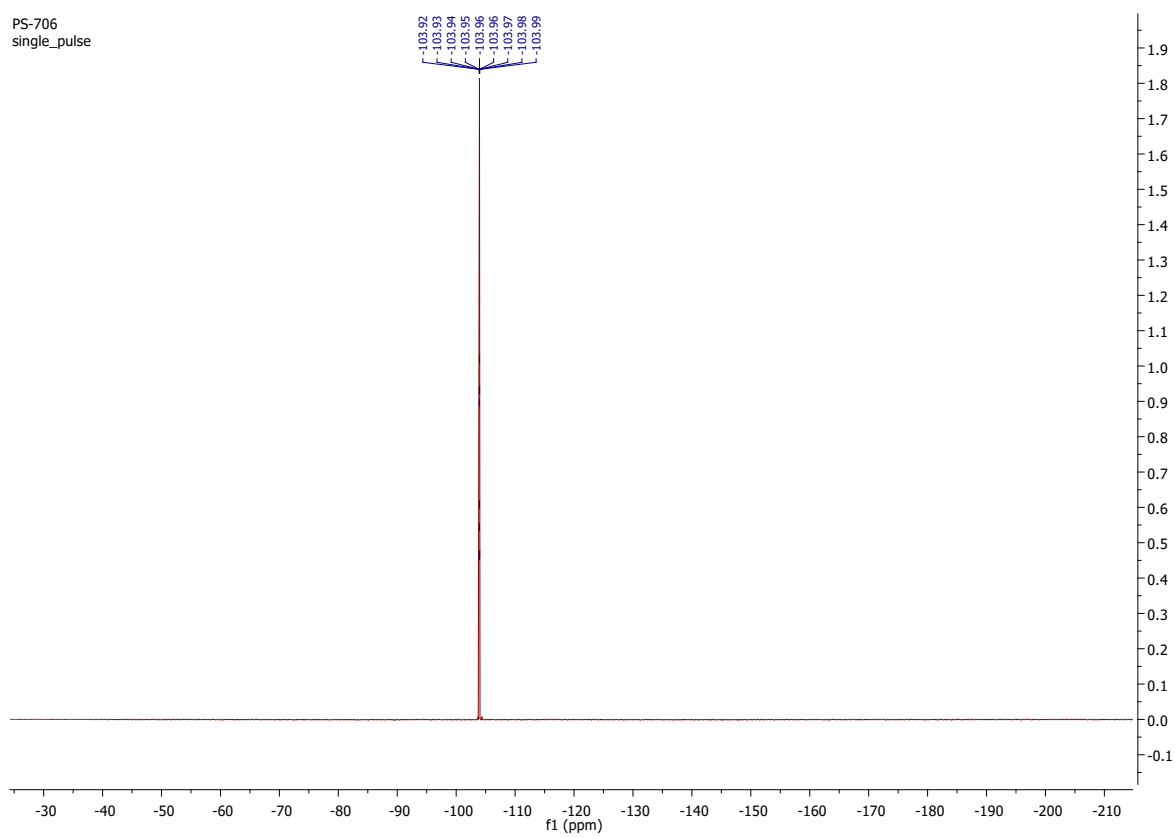

**Figure S2d.**  $^{19}\text{F}$  NMR spectrum of **6b**

3. (4-chlorophenyl)(6-methyl-2-phenylthiazolo[3,2-b][1,2,4]triazol-5-yl)methanone  
(6c)

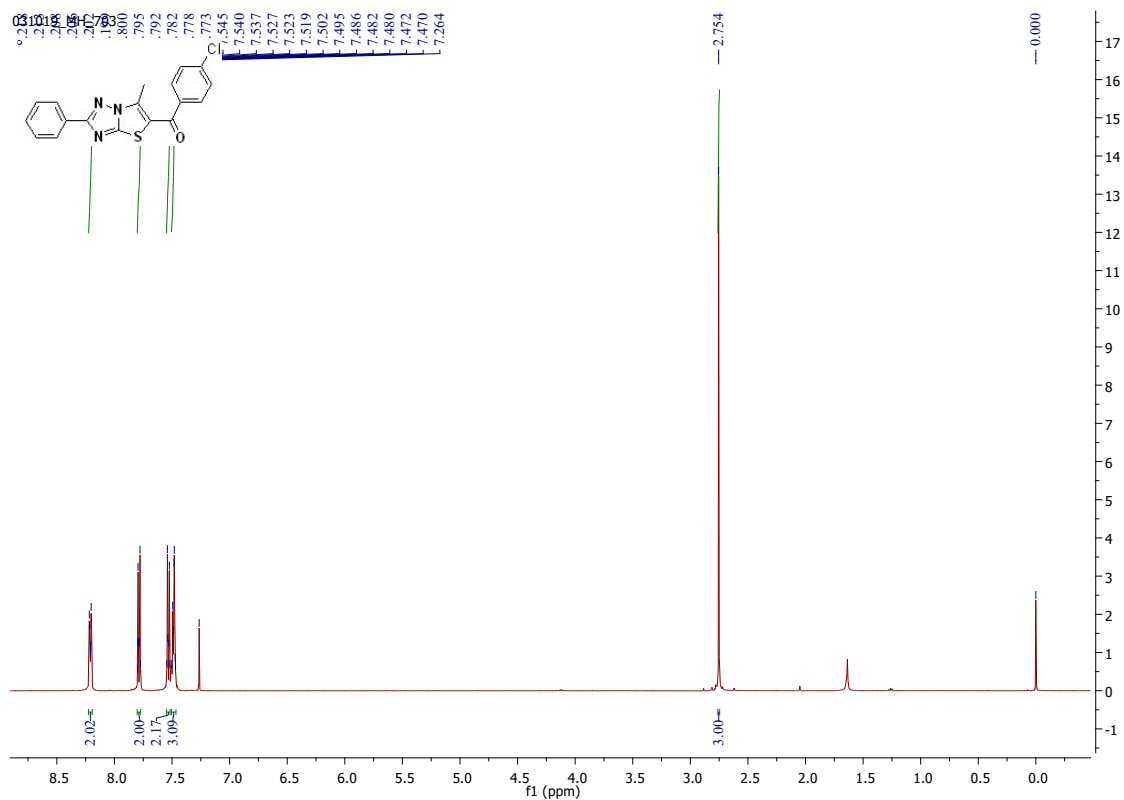

Figure S3a. <sup>1</sup>H NMR spectrum of 6c

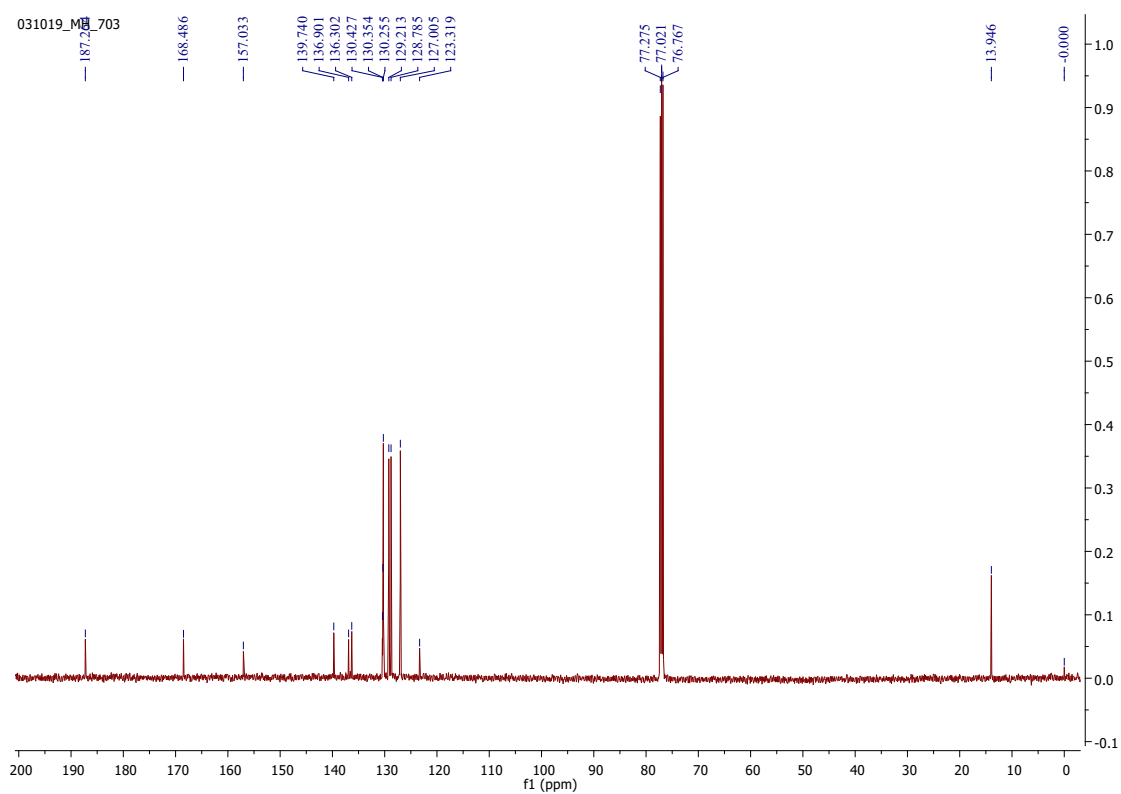

Figure S3b. <sup>13</sup>C NMR spectrum of 6c

4. (4-bromophenyl)(6-methyl-2-phenylthiazolo[3,2-b][1,2,4]triazol-5-yl)methanone  
(6d)

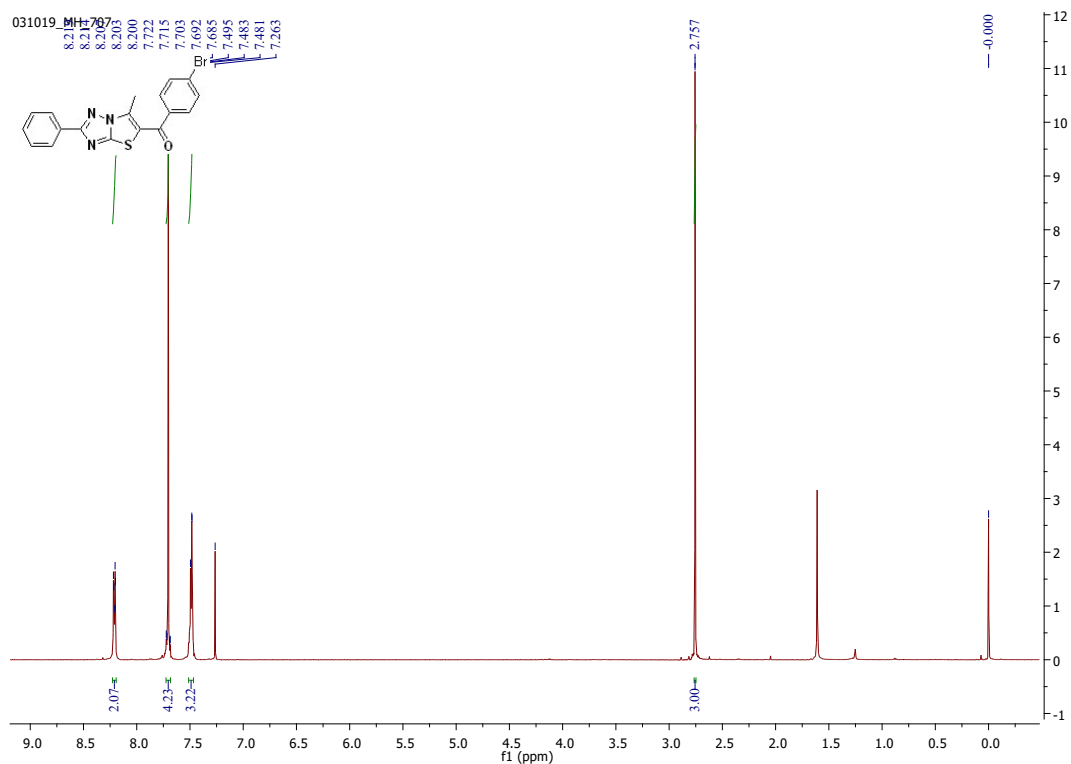

Figure S4a. <sup>1</sup>H NMR spectrum of 6d

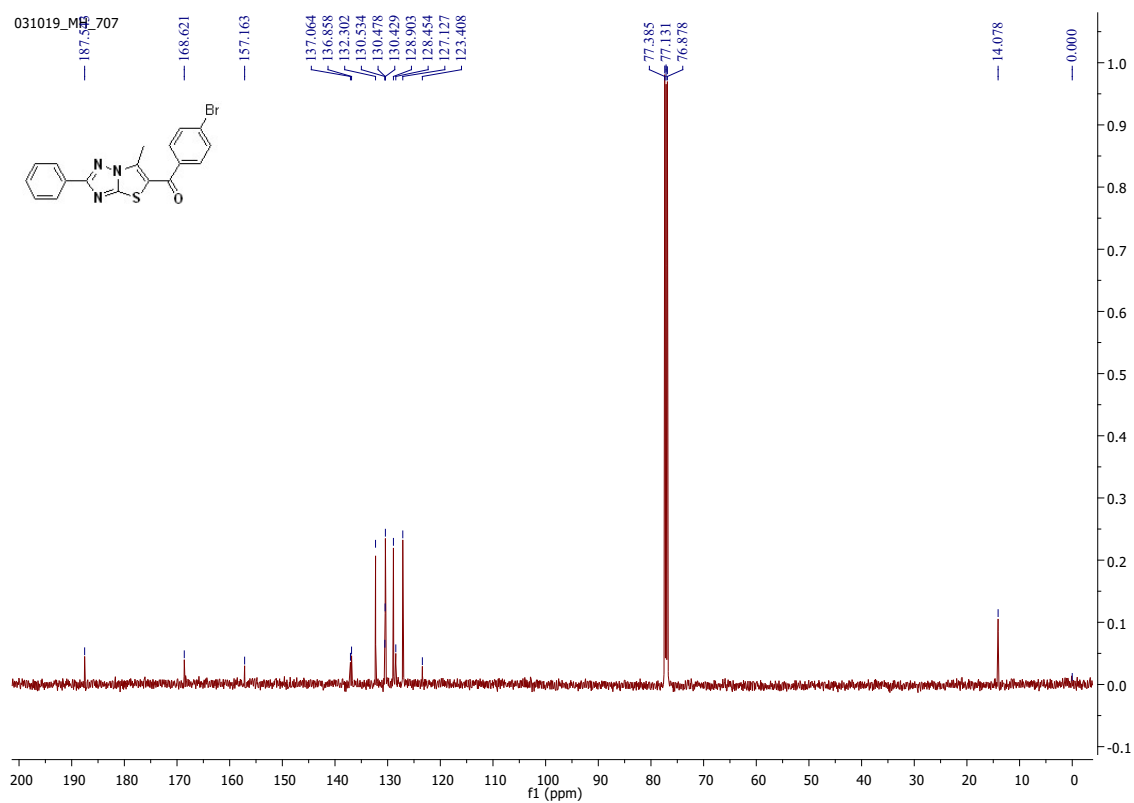

Figure S4b. <sup>13</sup>C NMR spectrum of 6d



5. (2,4-dichlorophenyl)(6-methyl-2-phenylthiazolo[3,2-b][1,2,4]triazol-5-yl)methanone (6e)

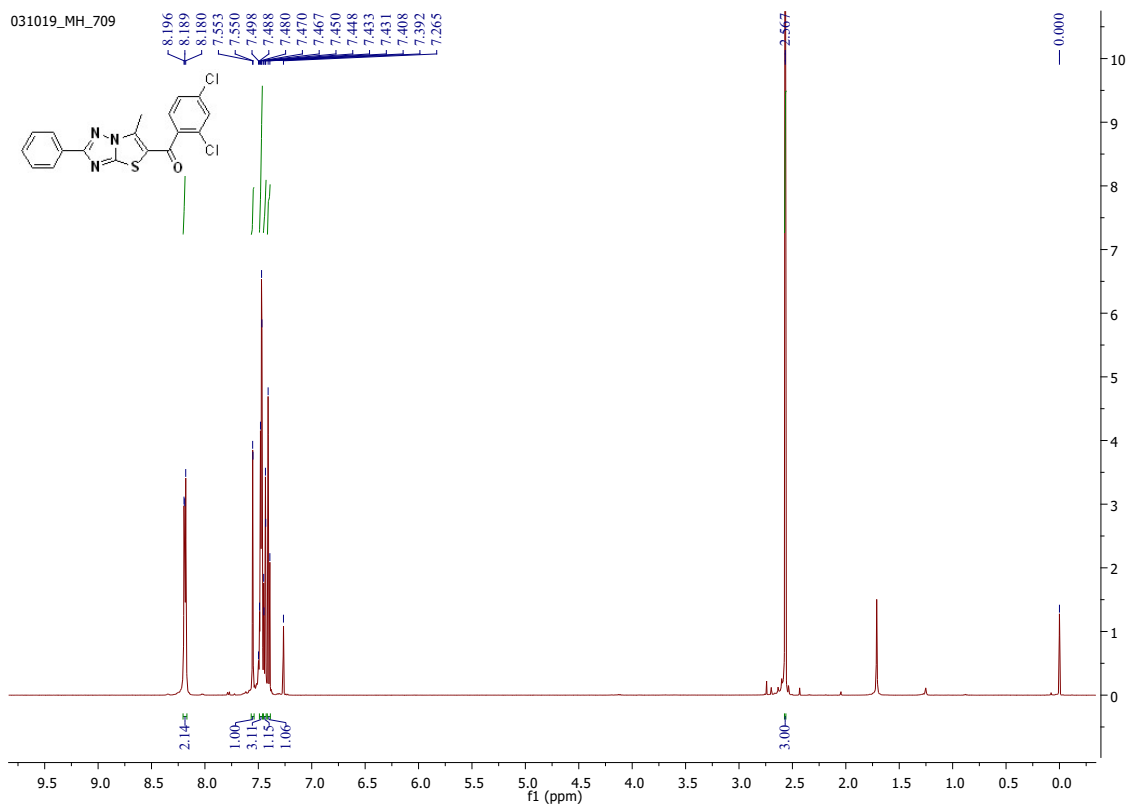

Figure S5a. <sup>1</sup>H NMR spectrum of 6e

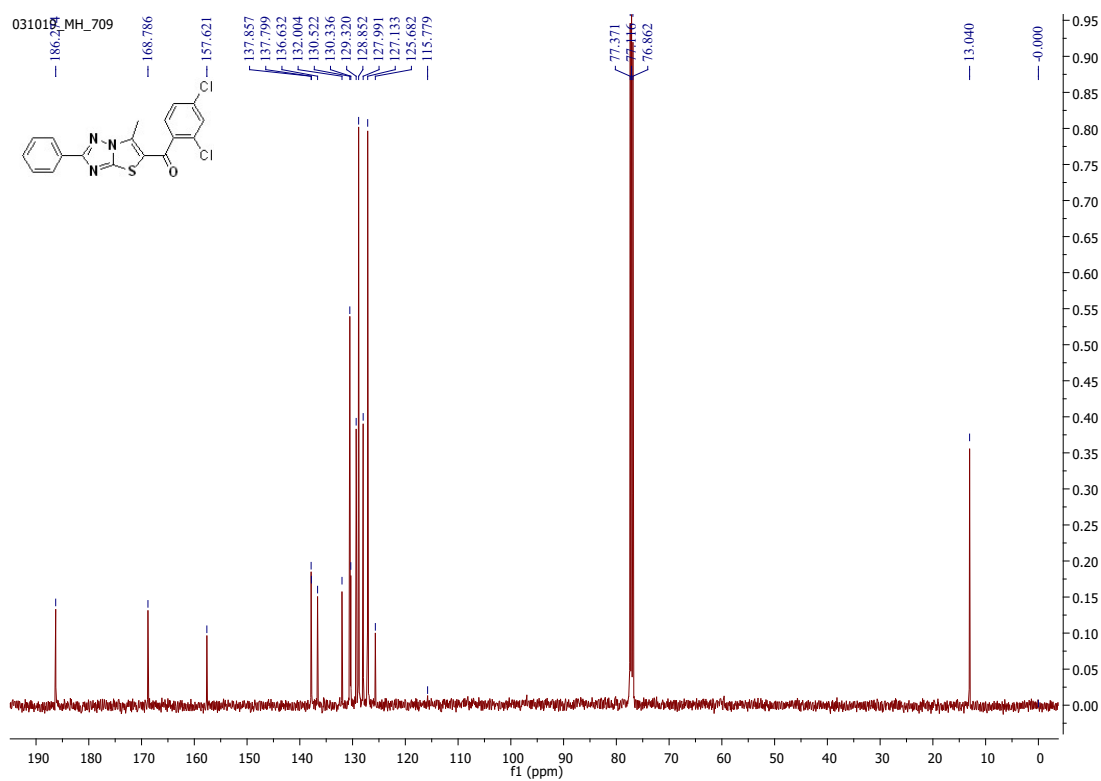

Figure S5b. <sup>13</sup>C NMR spectrum of 6e

6. (6-methyl-2-phenylthiazolo[3,2-b][1,2,4]triazol-5-yl)(p-tolyl)methanone (6f)

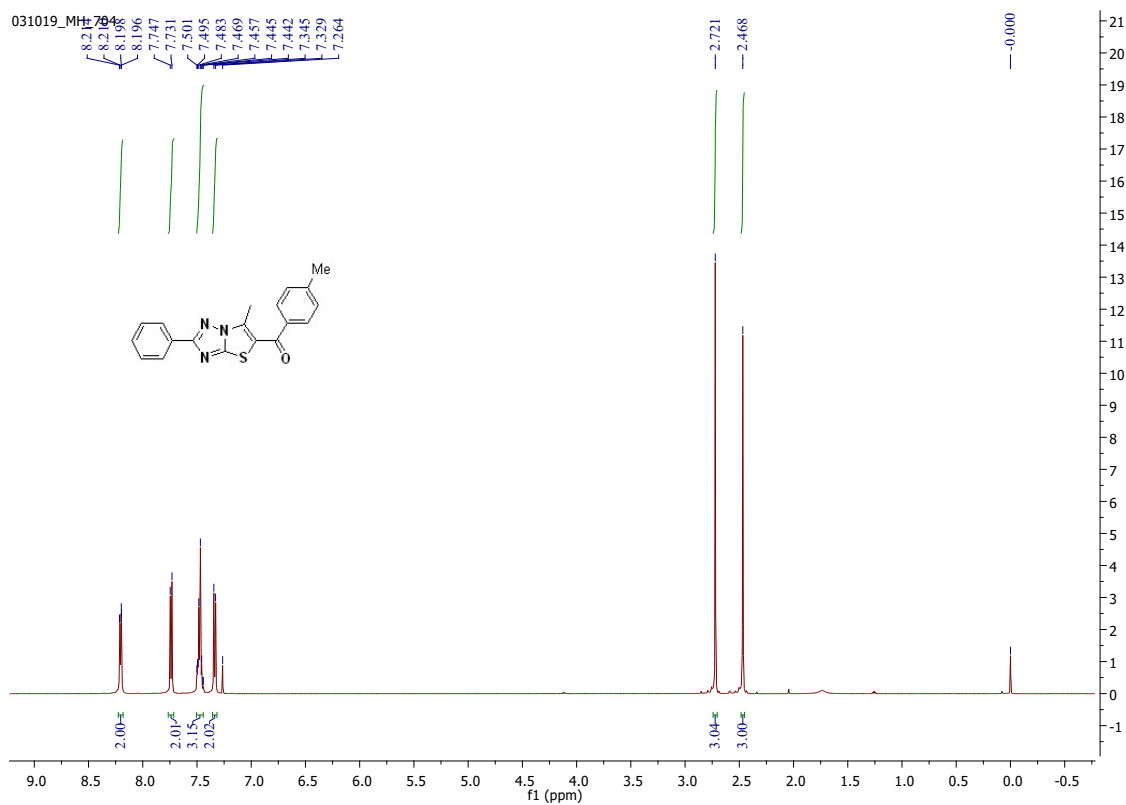

Figure S6a. <sup>1</sup>H NMR spectrum of 6f

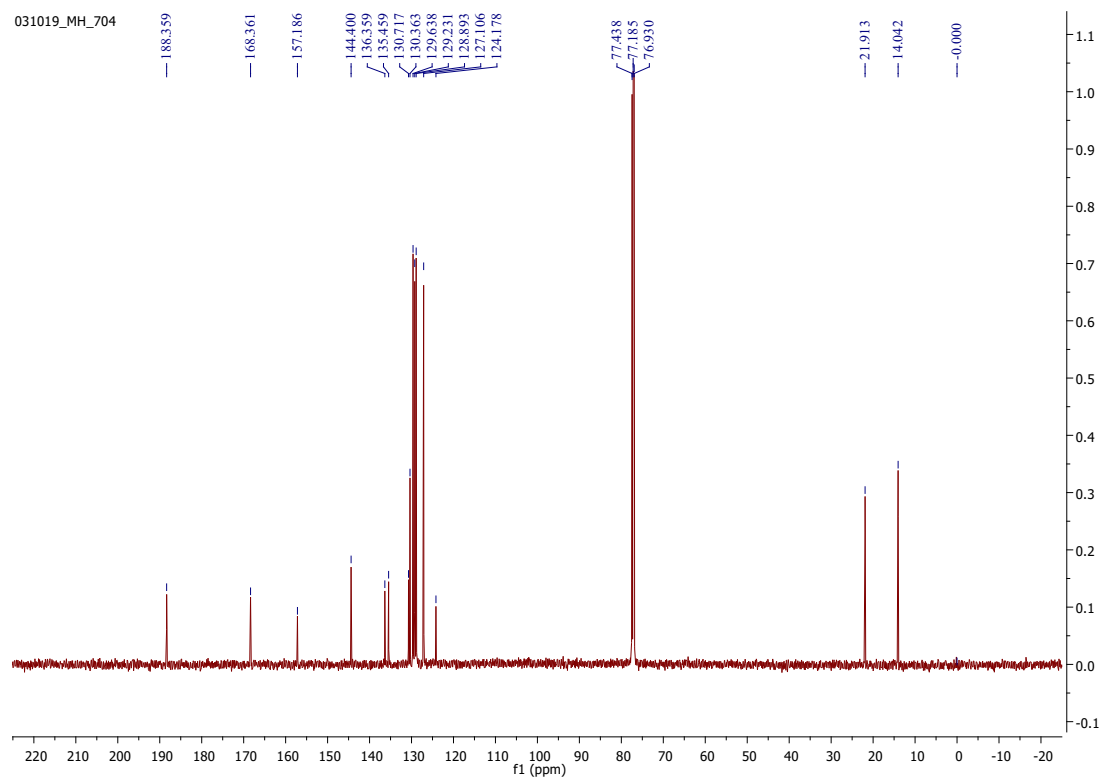

Figure S6b. <sup>13</sup>C NMR spectrum of 6f

7. (4-methoxyphenyl)(6-methyl-2-phenylthiazolo[3,2-b][1,2,4]triazol-5-yl)methanone (6g)

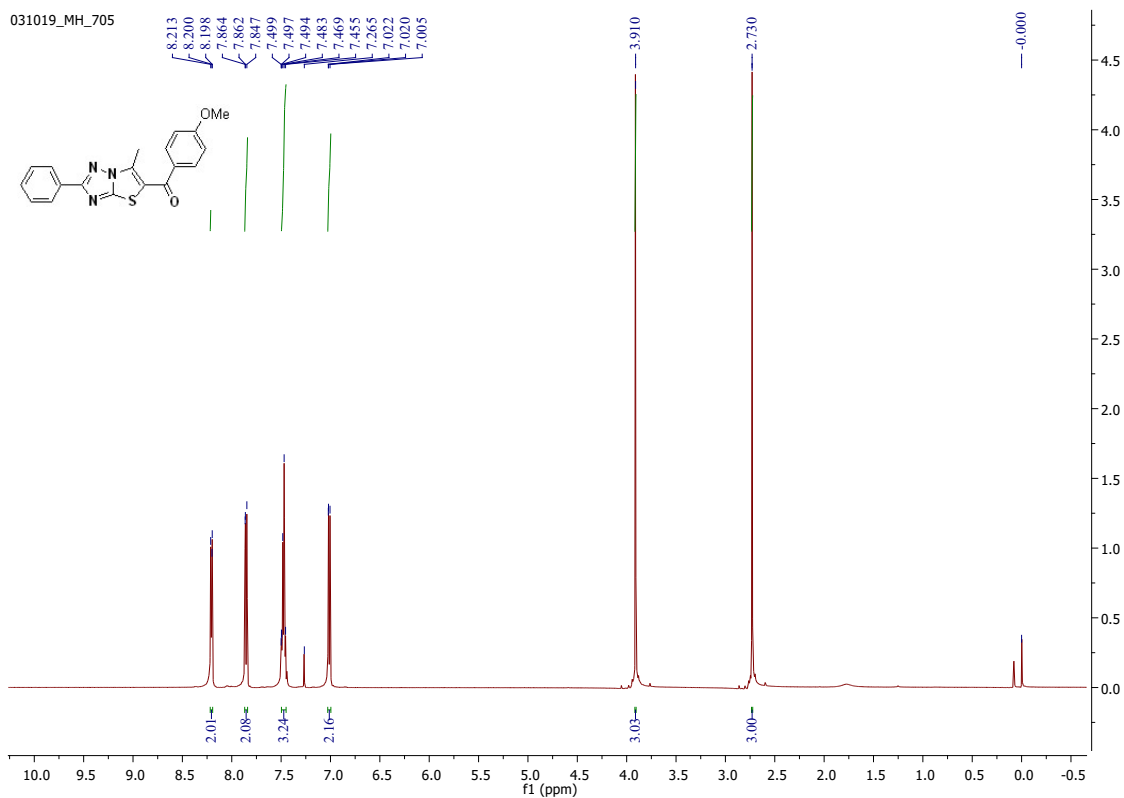

Figure S7a. <sup>1</sup>H NMR spectrum of 6g

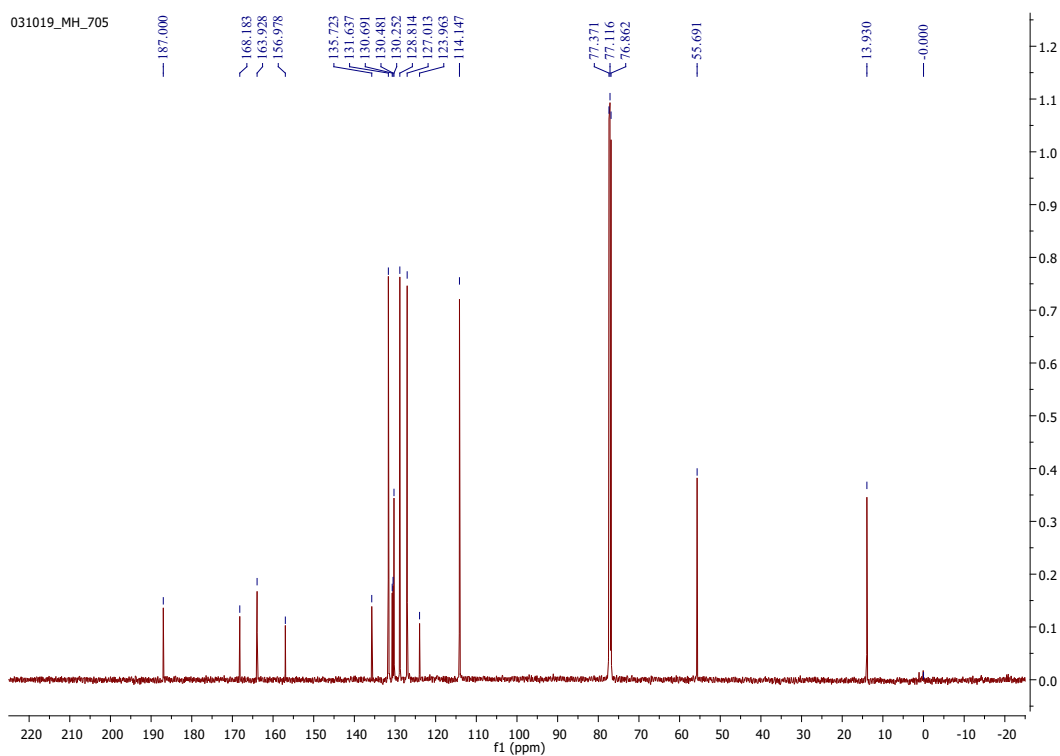

Figure S7b. <sup>13</sup>C NMR spectrum of 6g

8. (3-methoxyphenyl)(6-methyl-2-phenylthiazolo[3,2-b][1,2,4]triazol-5-yl)methanone (6h)

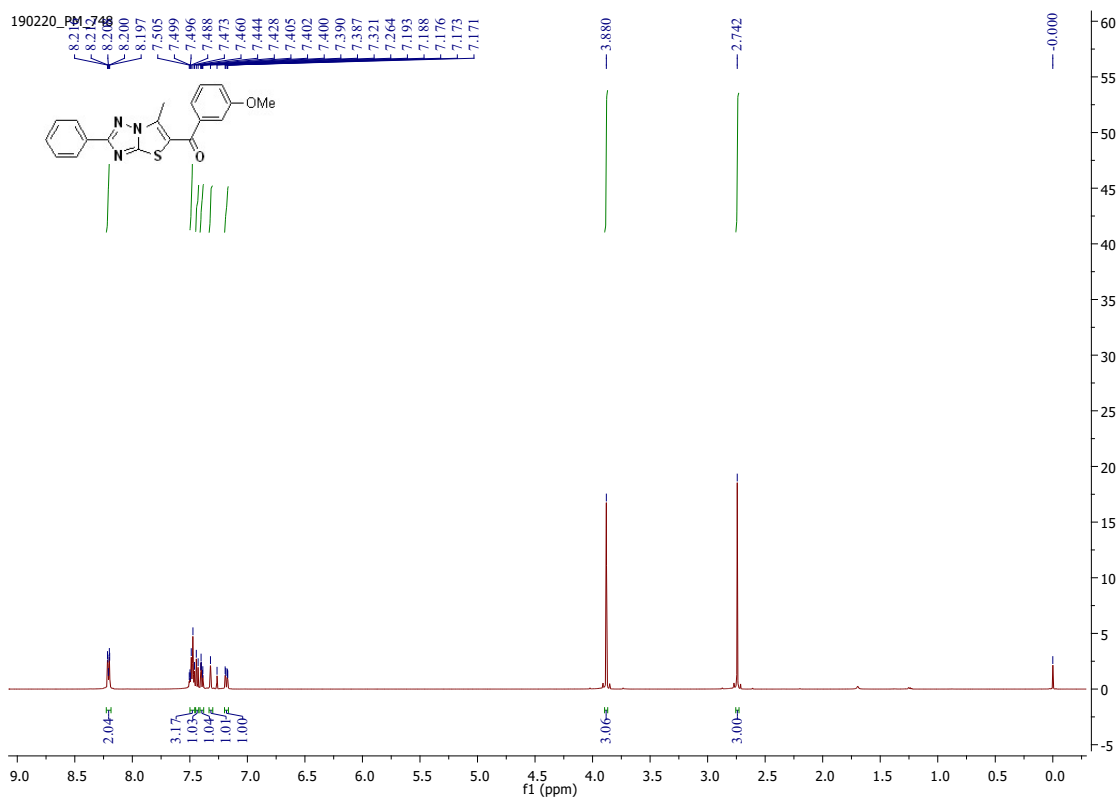

Figure S8a. <sup>1</sup>H NMR spectrum of 6h

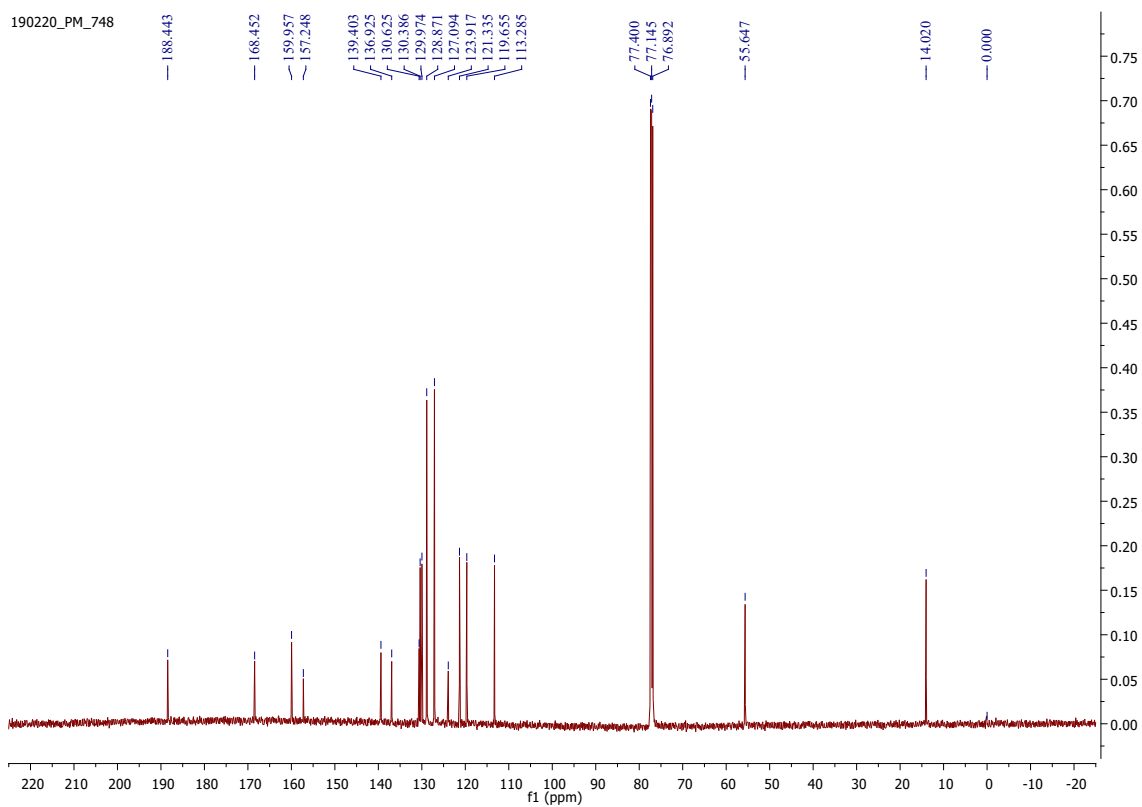

Figure S8b. <sup>13</sup>C NMR spectrum of 6h

9. (2-methoxyphenyl)(6-methyl-2-phenylthiazolo[3,2-b][1,2,4]triazol-5-yl)methanone (6i)

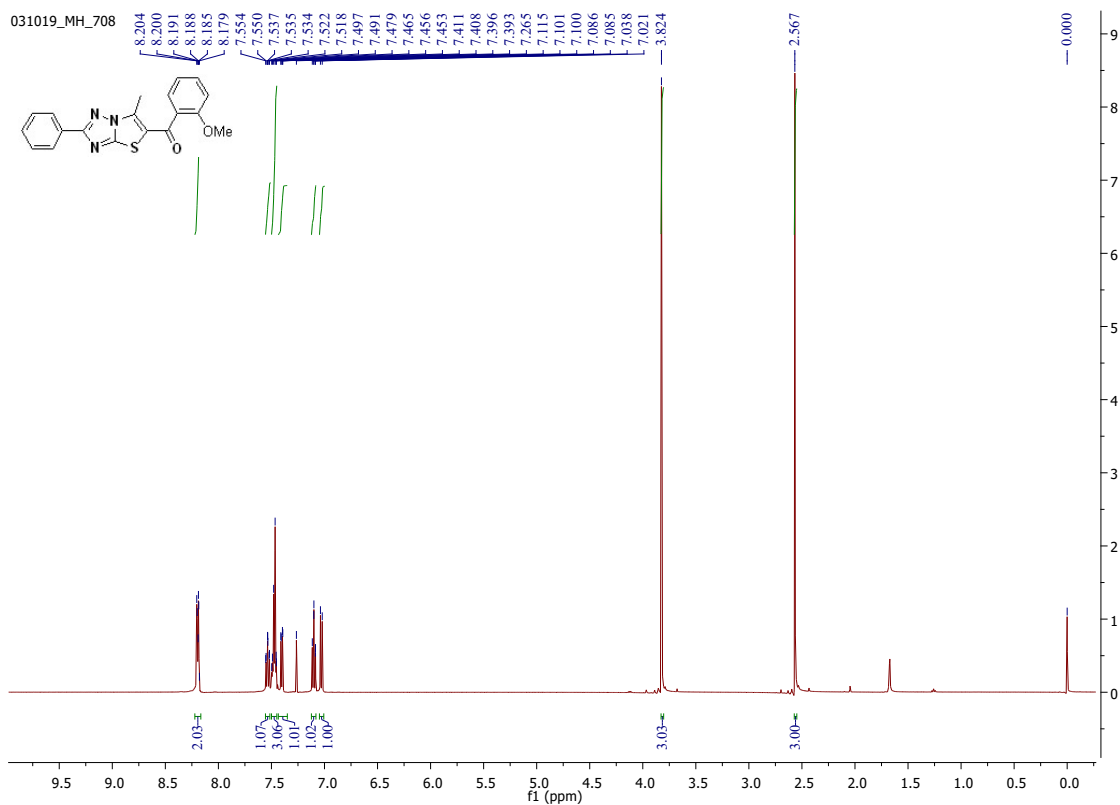

Figure S9a. <sup>1</sup>H NMR spectrum of 6i

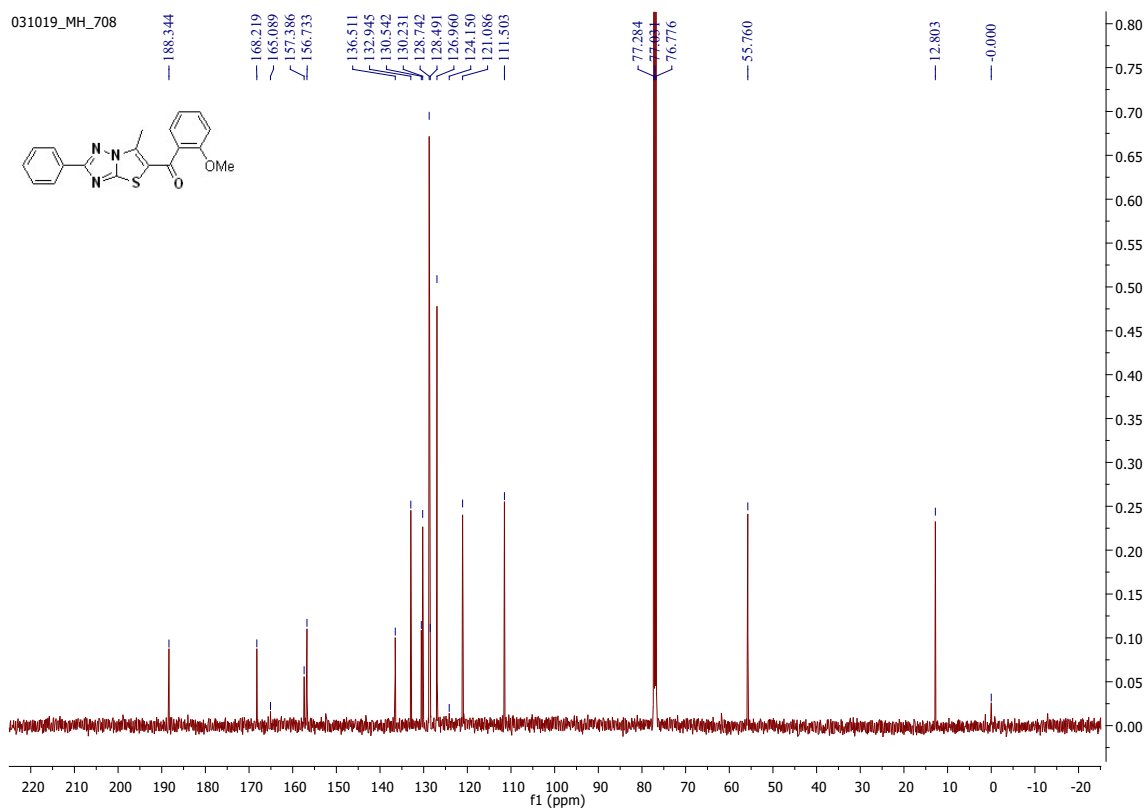

Figure S9b. <sup>13</sup>C NMR spectrum of 6i

10. (2-(4-methoxyphenyl)-6-methylthiazolo[3,2-b][1,2,4]triazol-5-yl)(phenyl)methanone  
(6j)

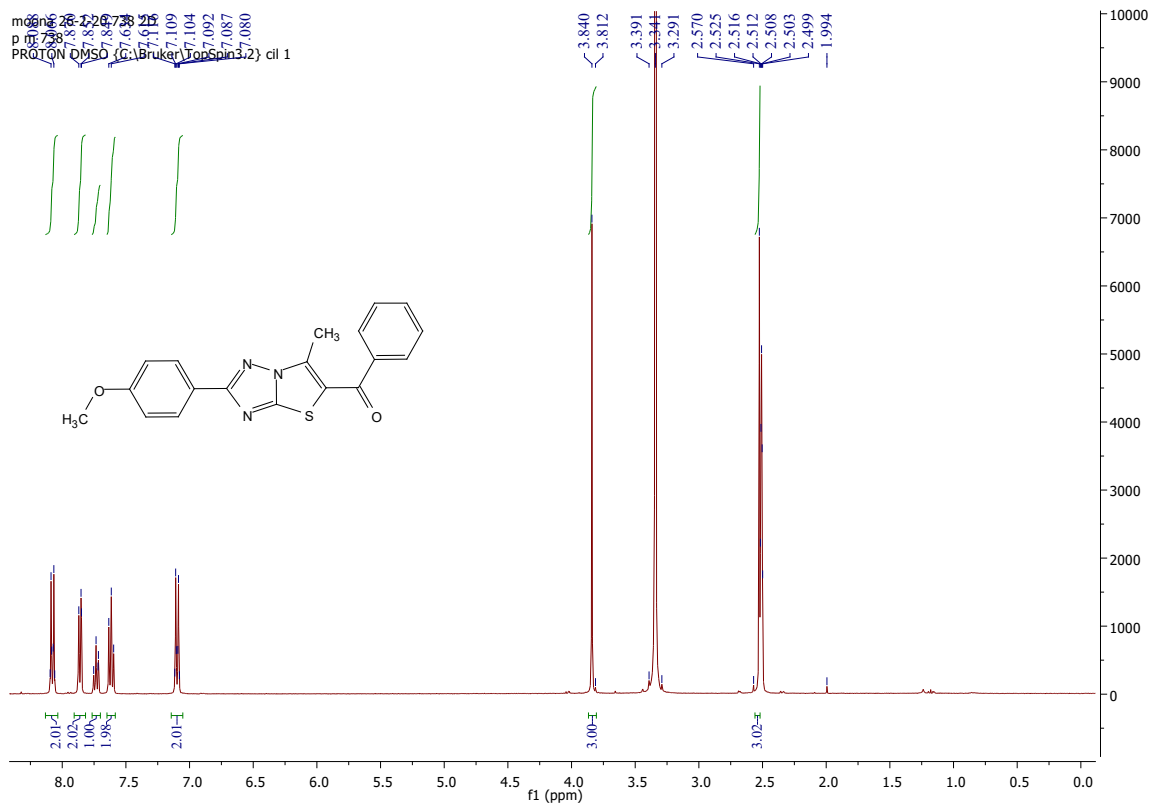

Figure S10a. <sup>1</sup>H NMR spectrum of 6j

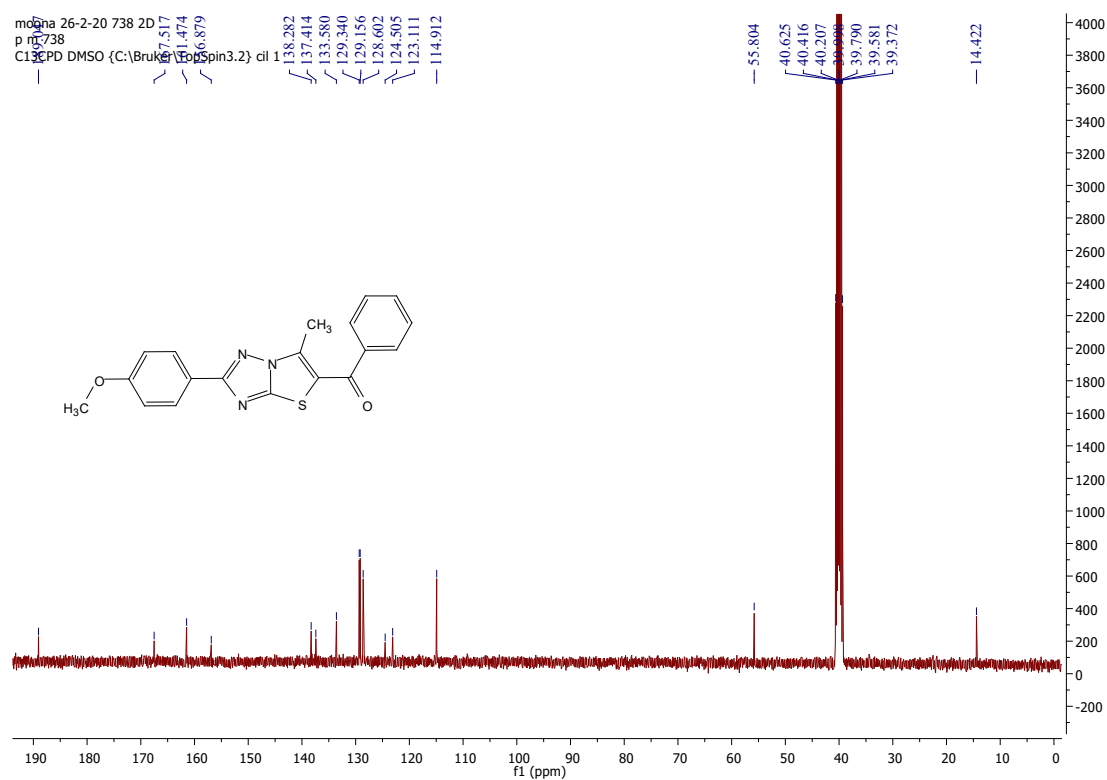

Figure S10b. <sup>13</sup>C NMR spectrum of 6j

11. (4-fluorophenyl)(2-(4-methoxyphenyl)-6-methylthiazolo[3,2-b][1,2,4]triazol-5-yl)methanone (6k)

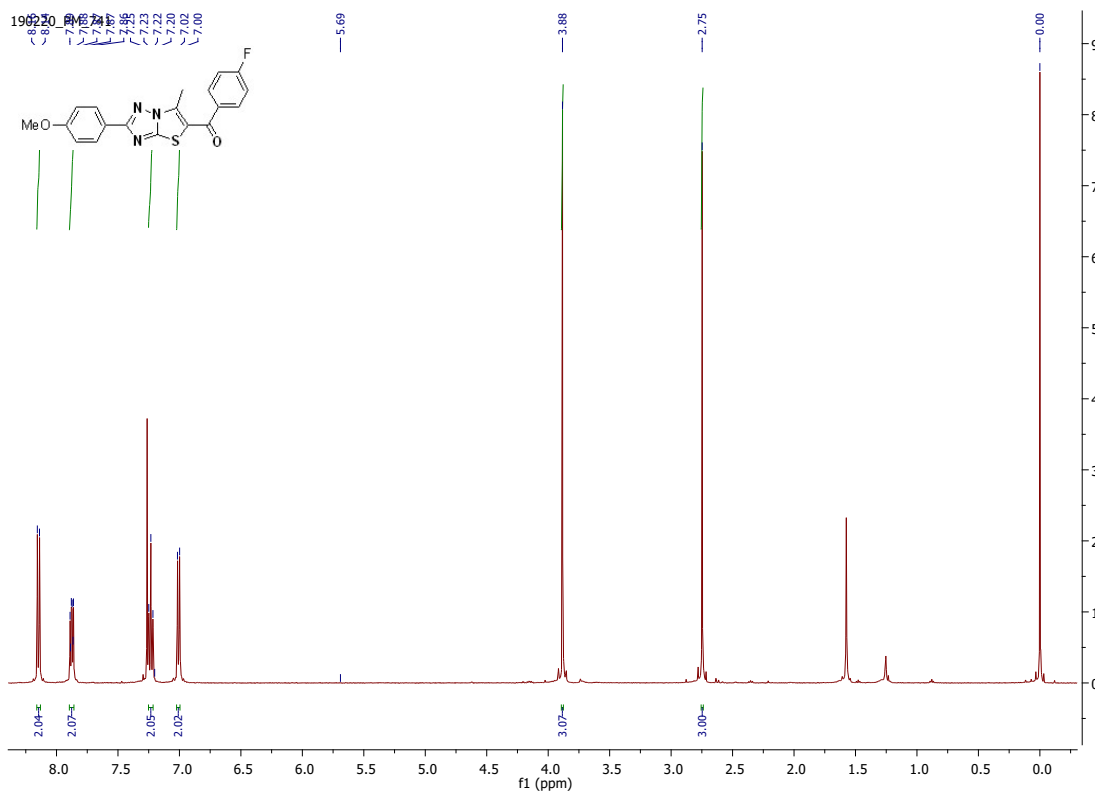

Figure S11a. <sup>1</sup>H NMR spectrum of 6k

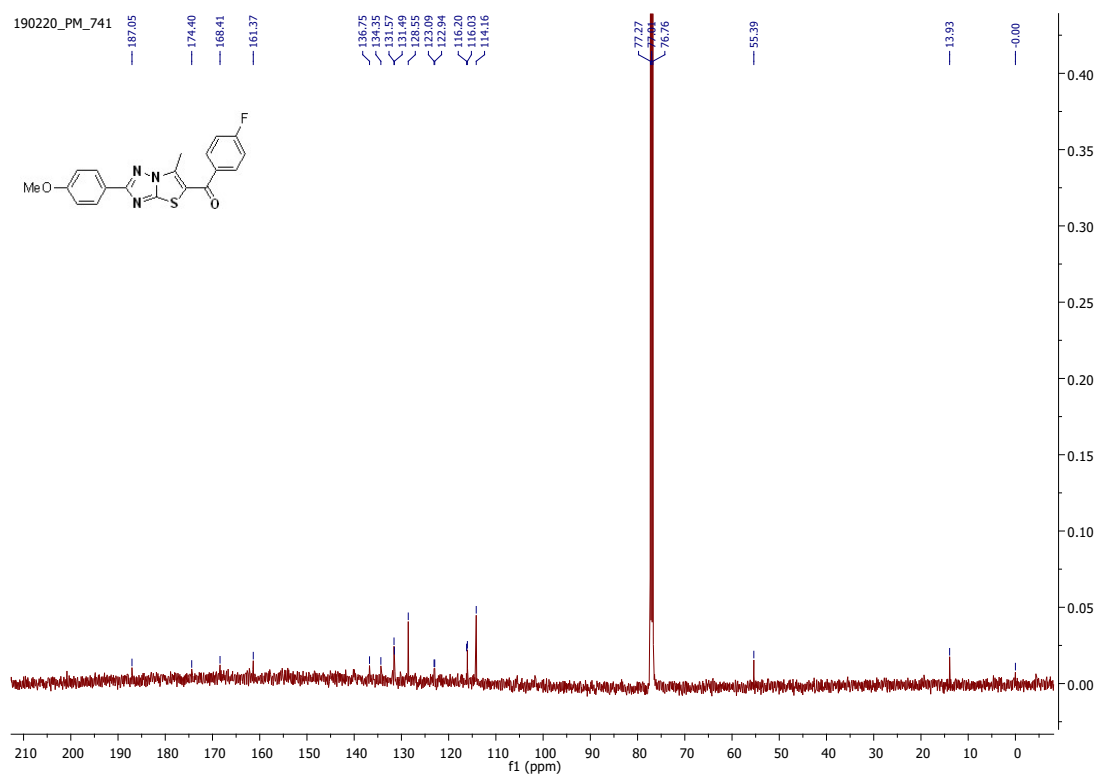

Figure S11b. <sup>13</sup>C NMR spectrum of 6k

190220\_PM\_741

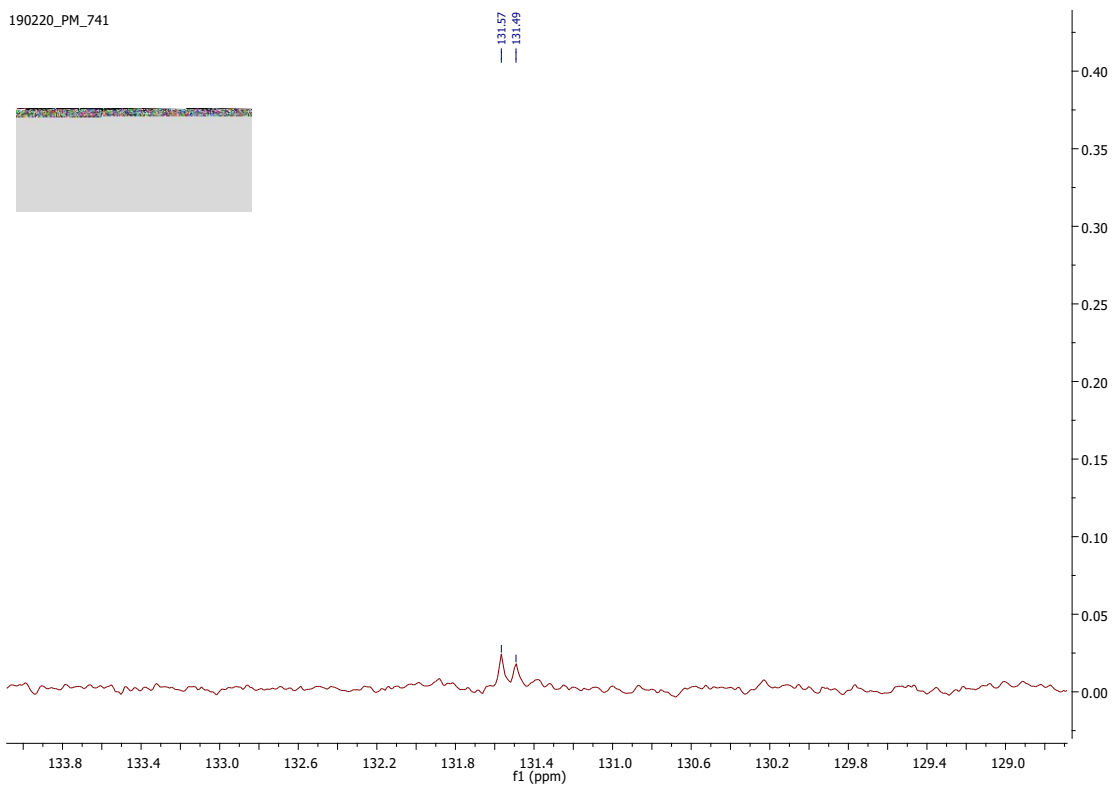

Figure S11c. Zoom <sup>13</sup>C NMR spectrum of 6k

PS-741  
single\_pulse

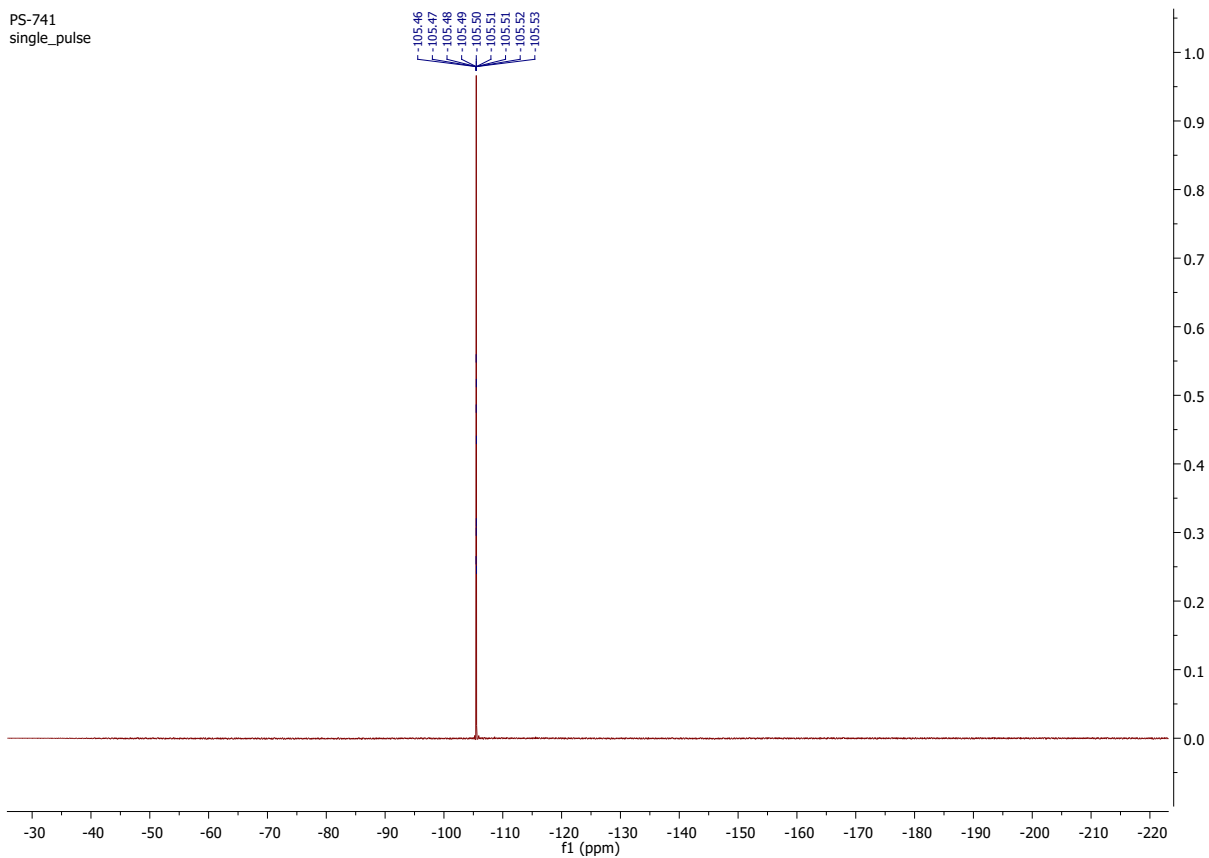

Figure S11d. <sup>19</sup>F NMR spectrum of 6k



12. (4-chlorophenyl)(2-(4-methoxyphenyl)-6-methylthiazolo[3,2-b][1,2,4]triazol-5-yl)methanone (6l)

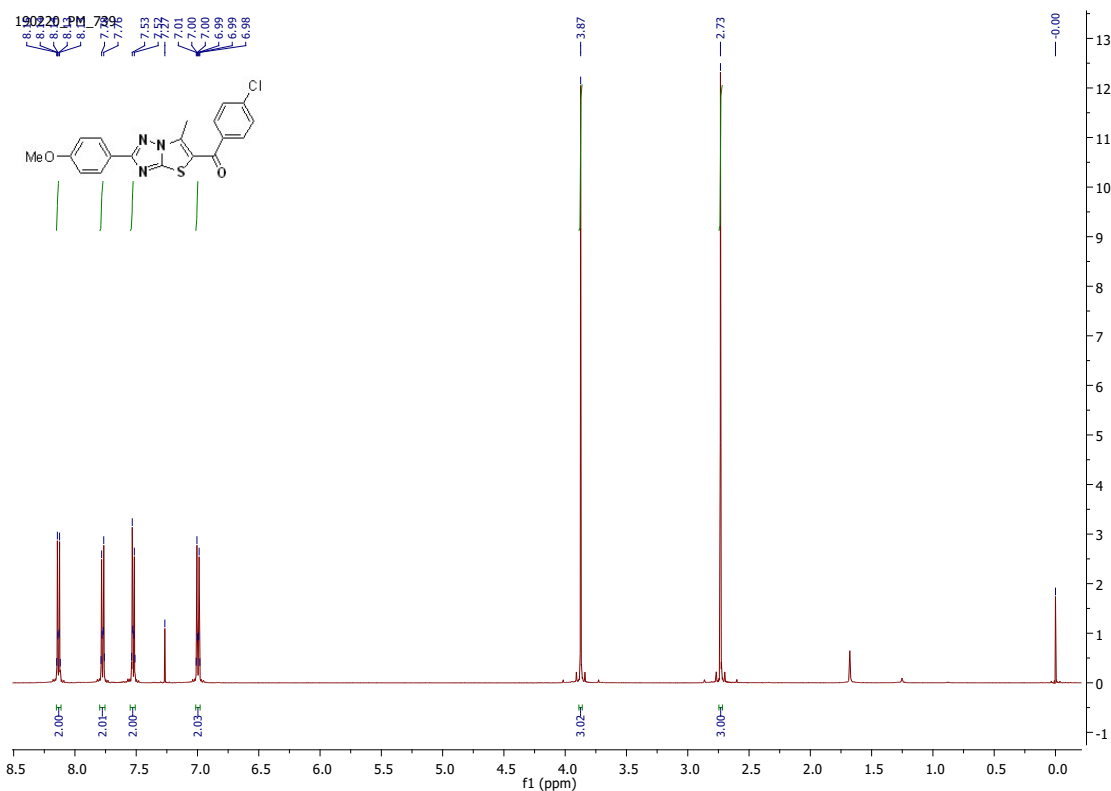

Figure S12a. <sup>1</sup>H NMR spectrum of 6l

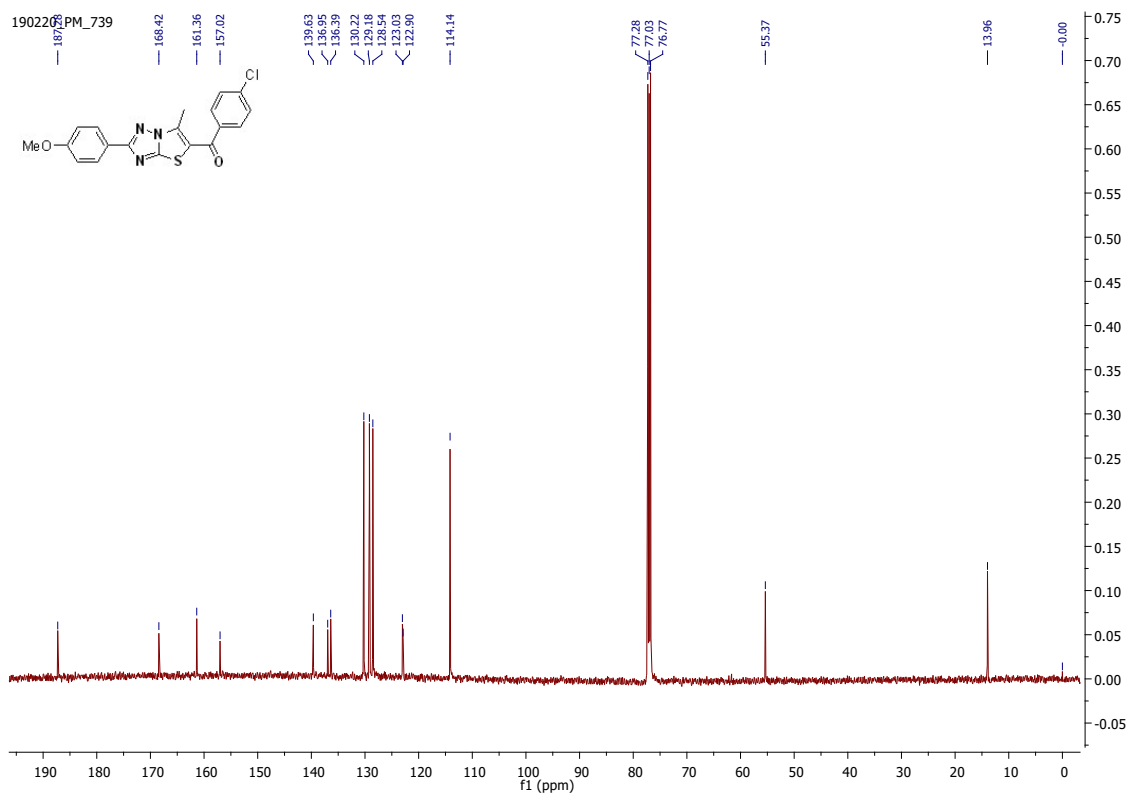

Figure S12b. <sup>13</sup>C NMR spectrum of 6l

13. (4-bromophenyl)(2-(4-methoxyphenyl)-6-methylthiazolo[3,2-b][1,2,4]triazol-5-yl)methanone (6m)

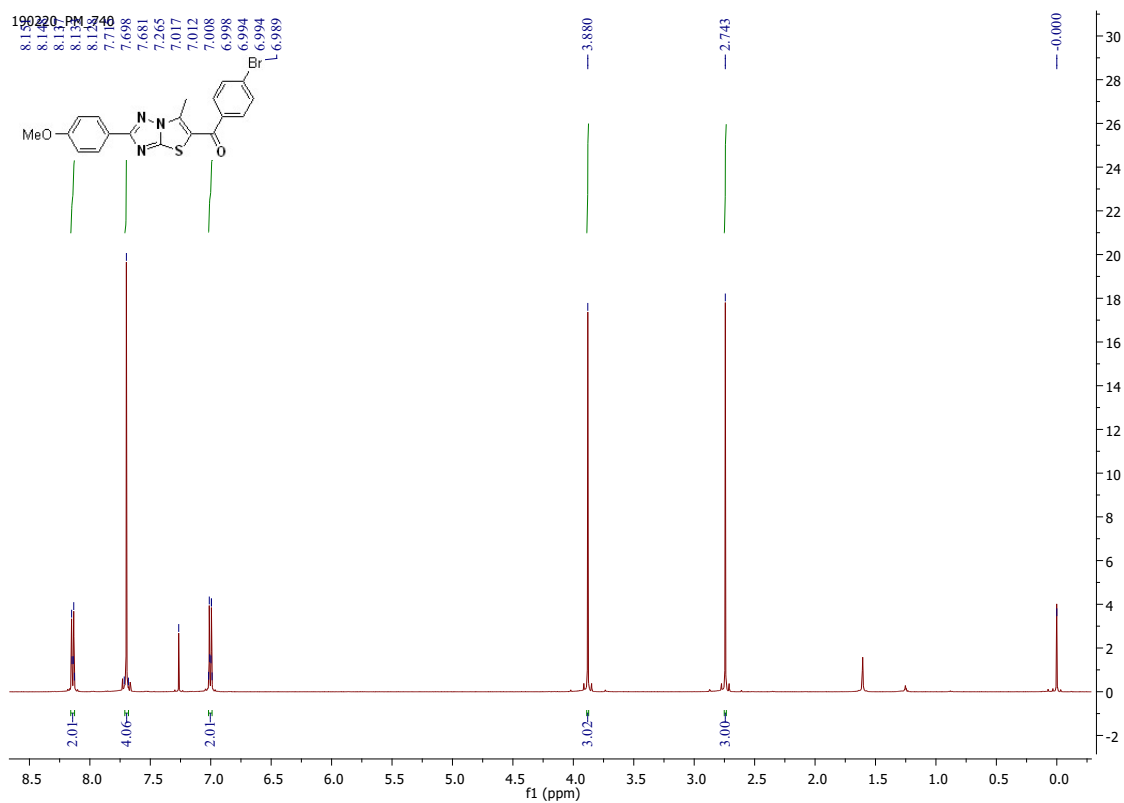

Figure S13a. <sup>1</sup>H NMR spectrum of 6m

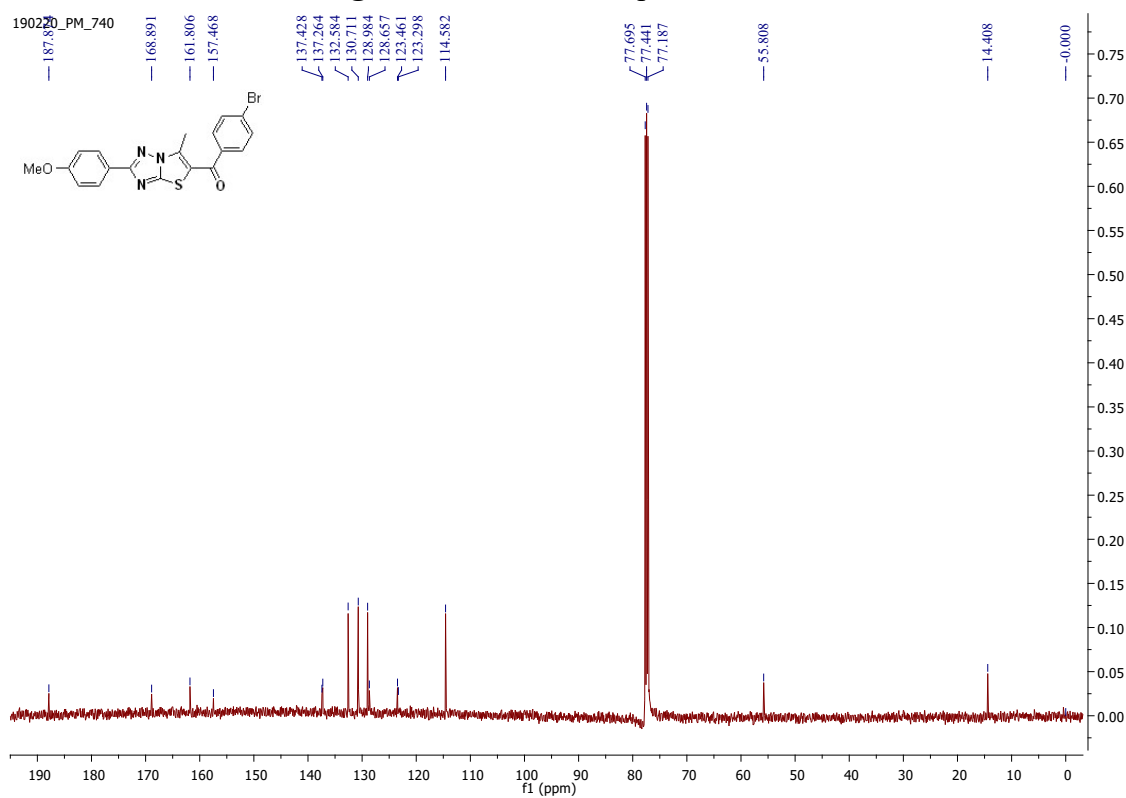

Figure S13b. <sup>13</sup>C NMR spectrum of 6m

14. (2,4-dichlorophenyl)(2-(4-methoxyphenyl)-6-methylthiazolo[3,2-b][1,2,4]triazol-5-yl)methanone (6n)

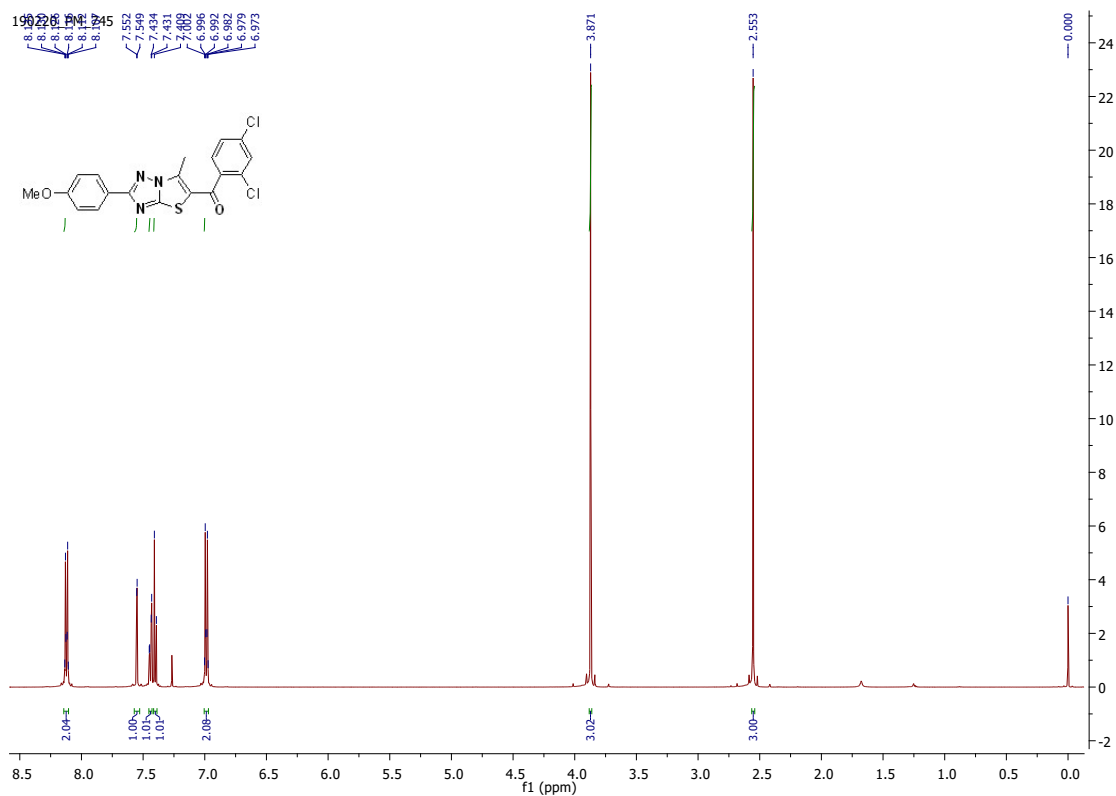

Figure S14a. <sup>1</sup>H NMR spectrum of 6n

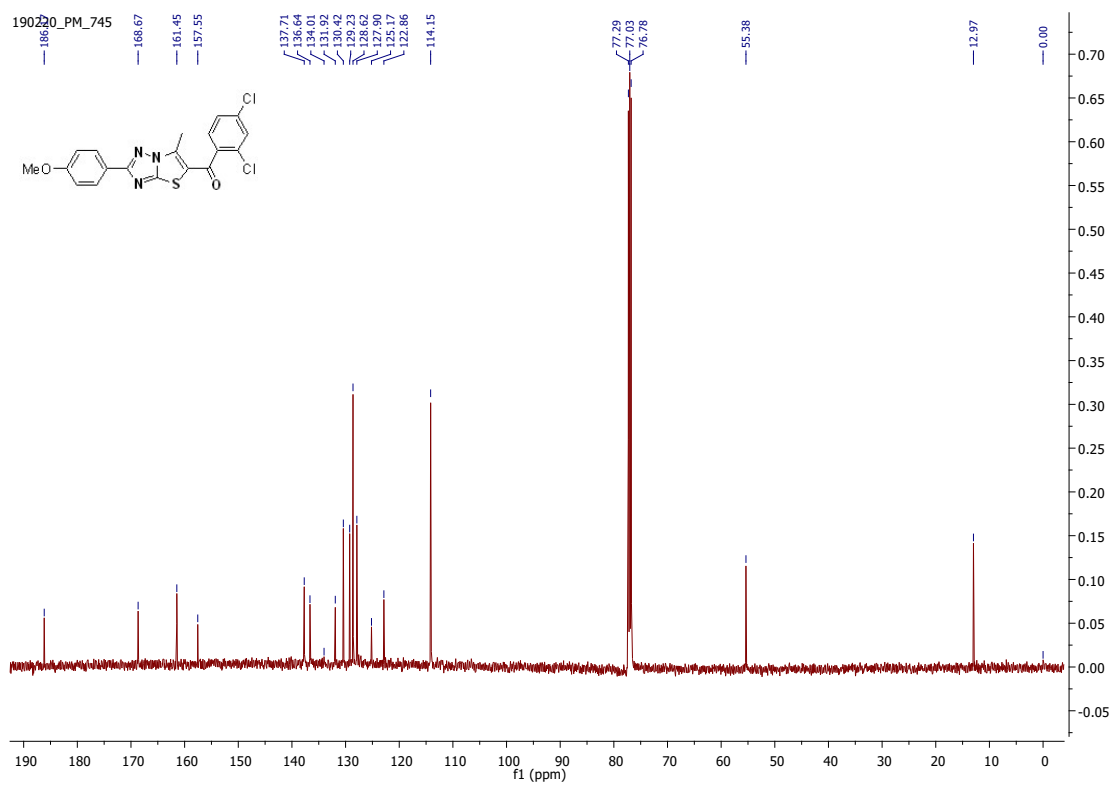

Figure S14b. <sup>13</sup>C NMR spectrum of 6n

15. (2-(4-methoxyphenyl)-6-methylthiazolo[3,2-b][1,2,4]triazol-5-yl)(p-tolyl)methanone (60)

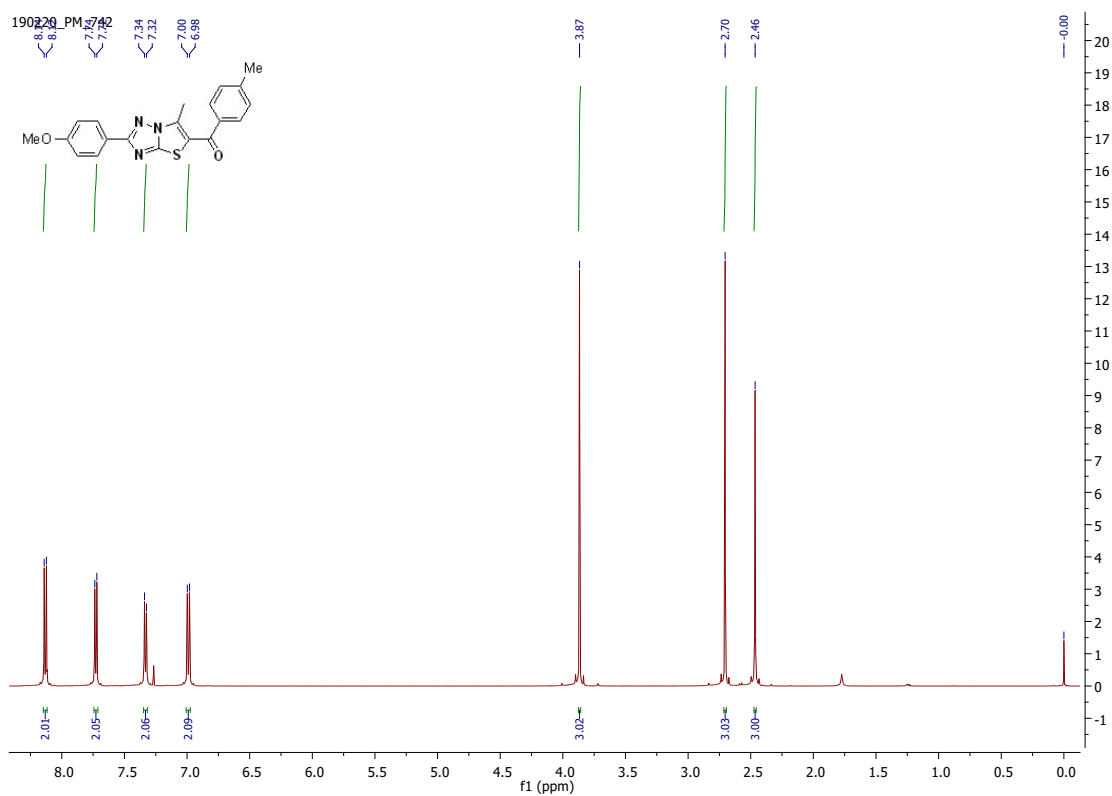

Figure S15a. <sup>1</sup>H NMR spectrum of 60

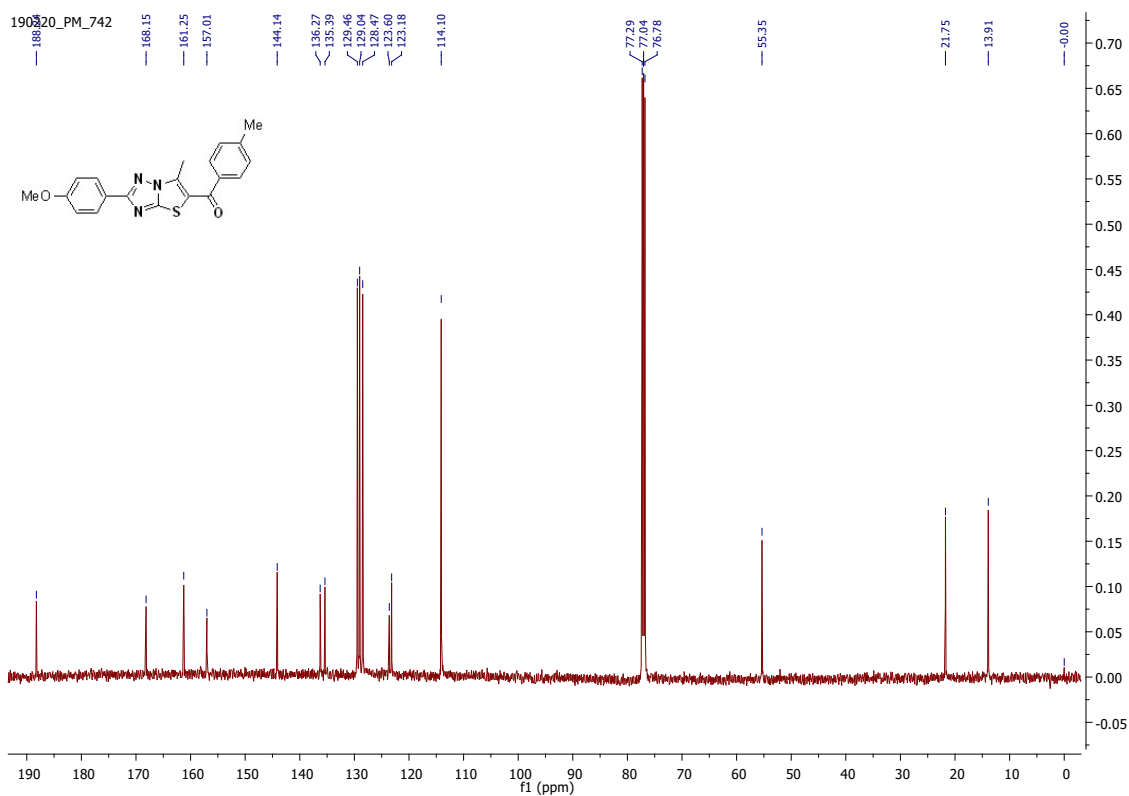

Figure S15b. <sup>13</sup>C NMR spectrum of 60

16. (4-methoxyphenyl)(2-(4-methoxyphenyl)-6-methylthiazolo[3,2-b][1,2,4]triazol-5-yl)methanone (6p)

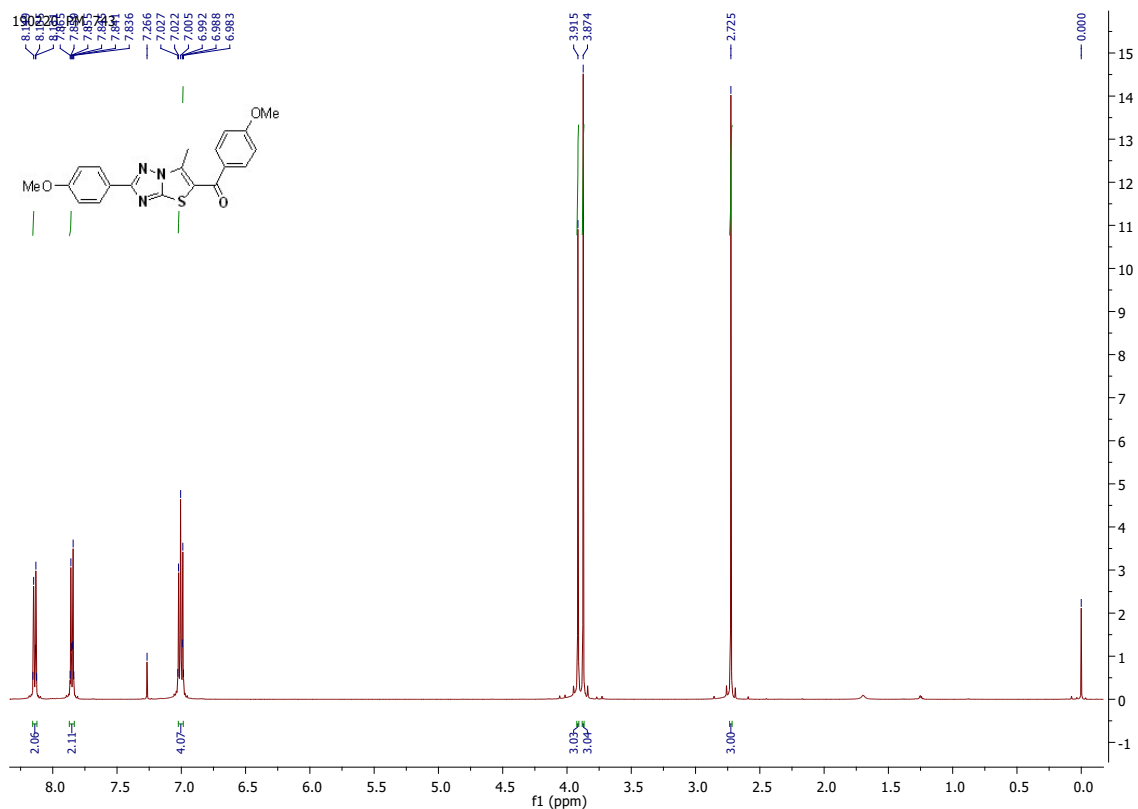

Figure S16a. <sup>1</sup>H NMR spectrum of 6p

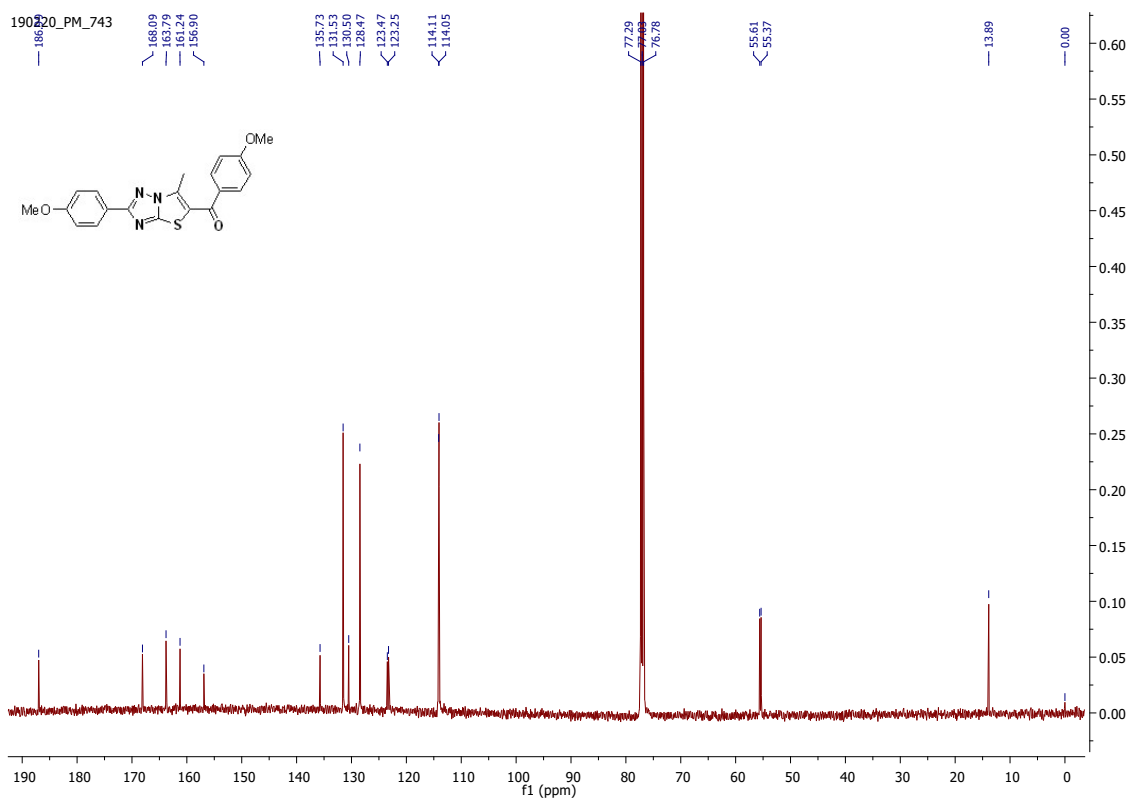

Figure S16b. <sup>13</sup>C NMR spectrum of 6p

17. (3-methoxyphenyl)(2-(4-methoxyphenyl)-6-methylthiazolo[3,2-b][1,2,4]triazol-5-yl)methanone (6q)

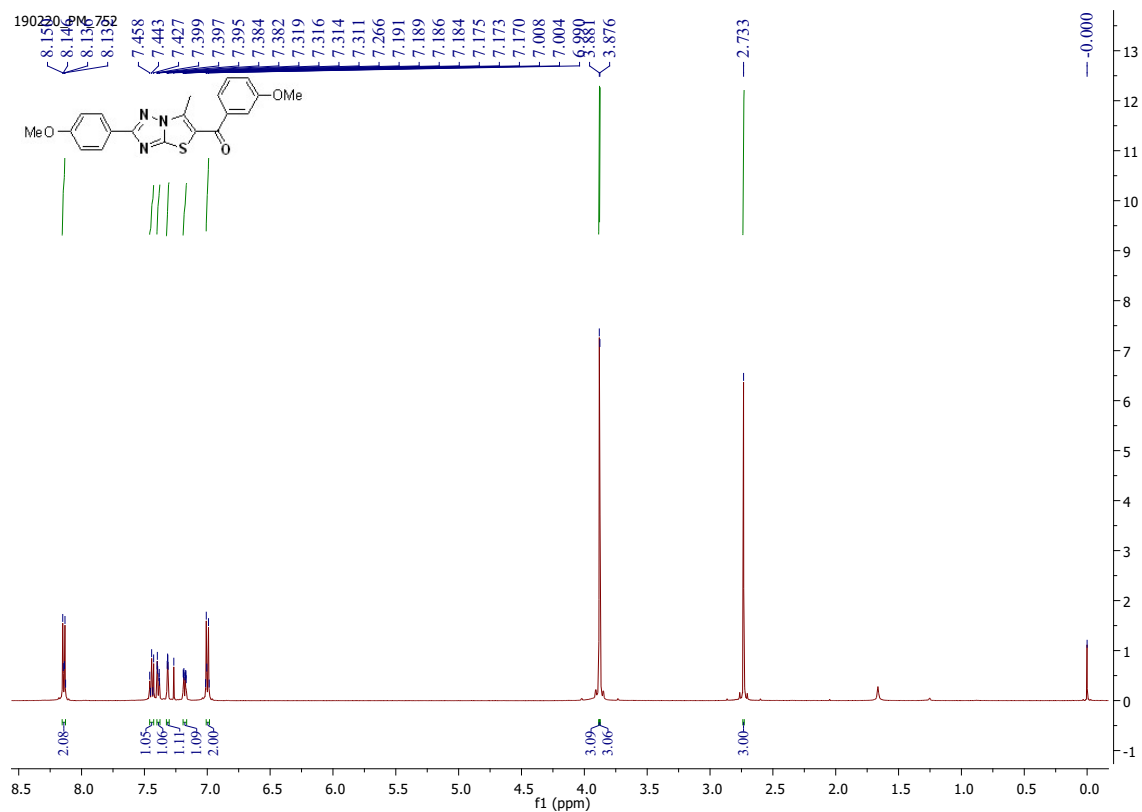

Figure S17a. <sup>1</sup>H NMR spectrum of 6q

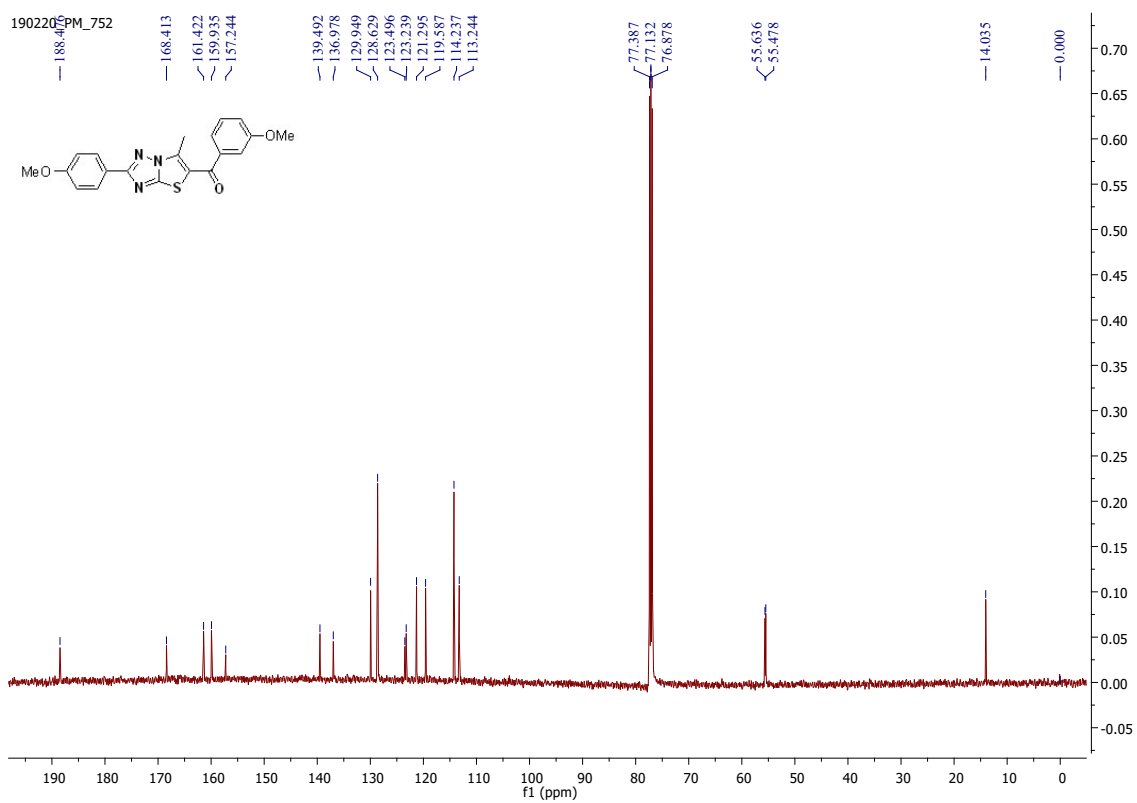

Figure S17b. <sup>13</sup>C NMR spectrum of 6q

18. (2-(4-methoxyphenyl)-6-methylthiazolo[3,2-b][1,2,4]triazol-5-yl)(thiophen-2-yl)methanone (6r)

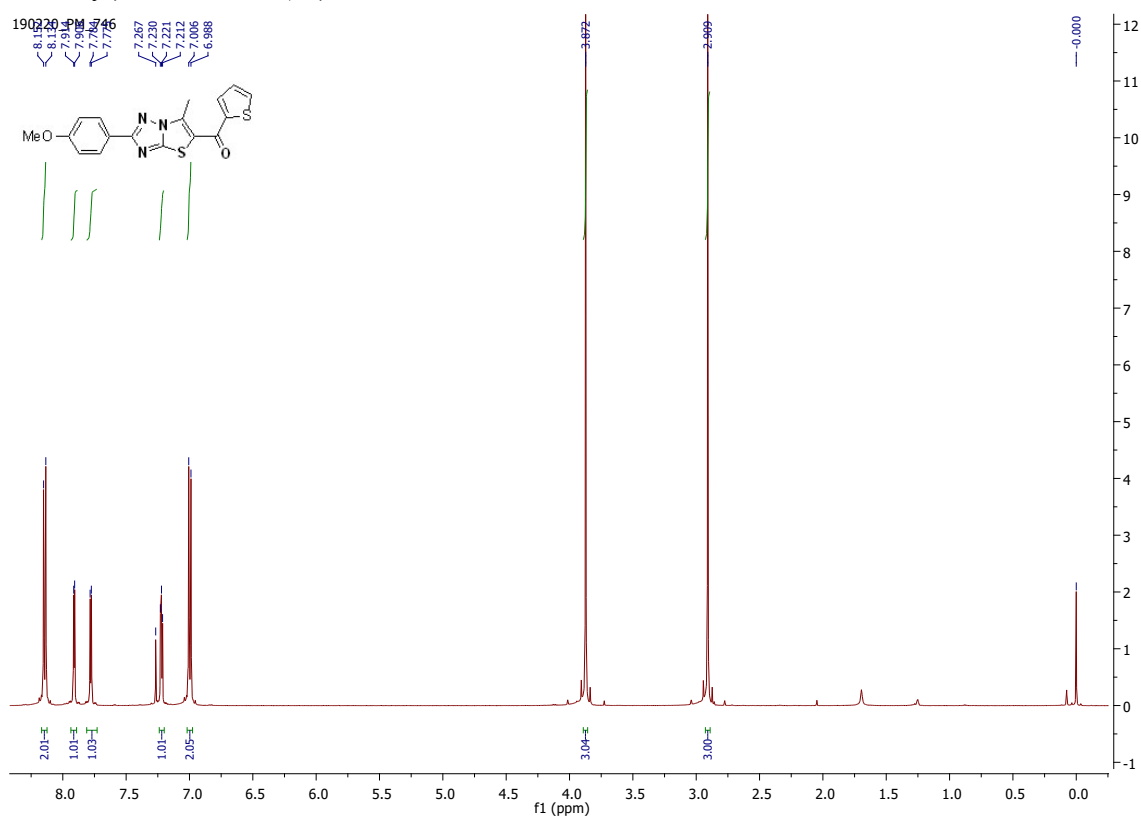

Figure S18a. <sup>1</sup>H NMR spectrum of 6r

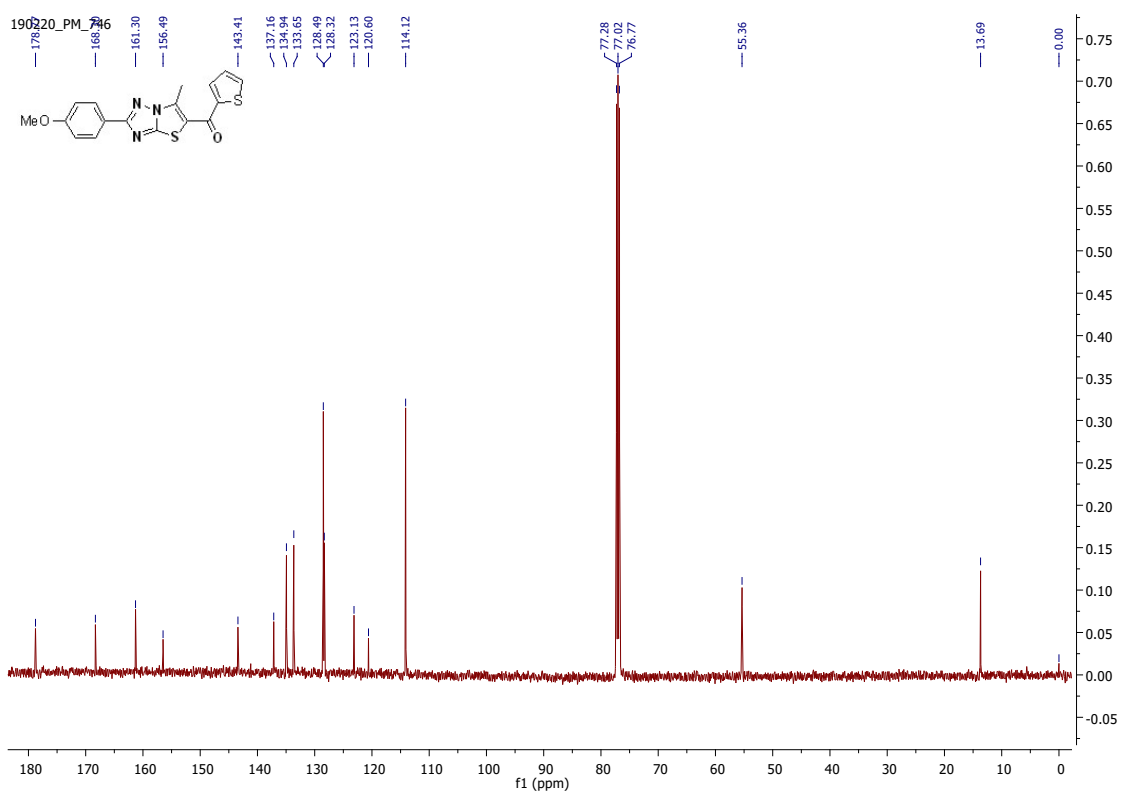

Figure S18b. <sup>13</sup>C NMR spectrum of 6r

## 2D NMR (HMBC & HMQC)

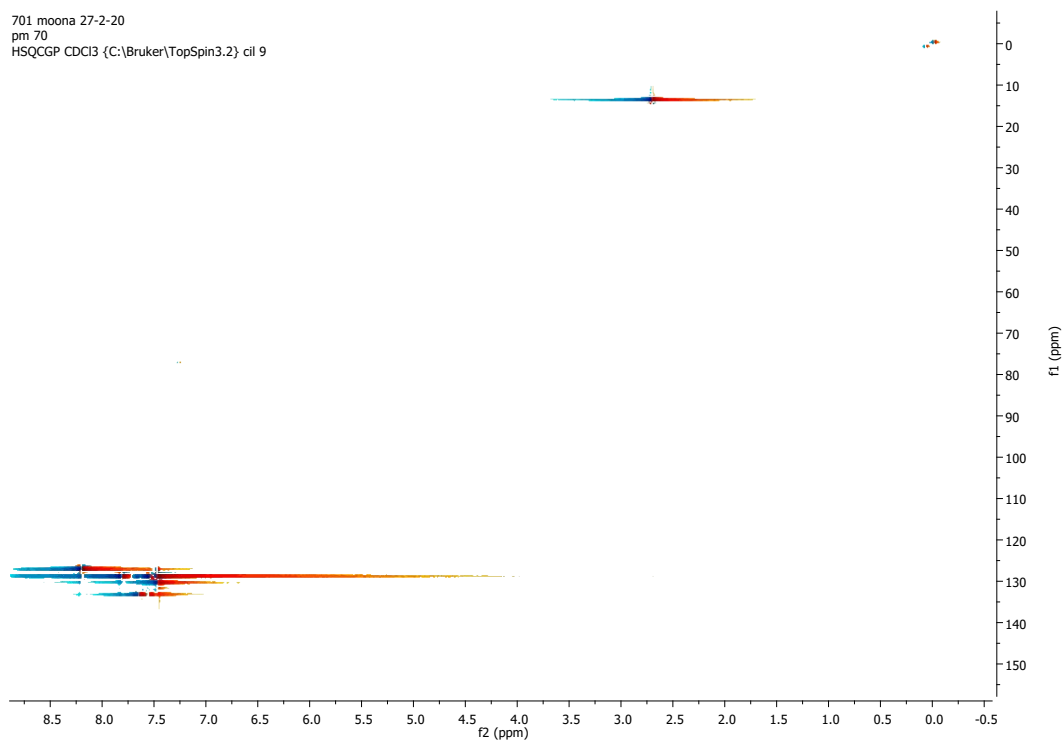

Figure S19a. HMQC of 6a

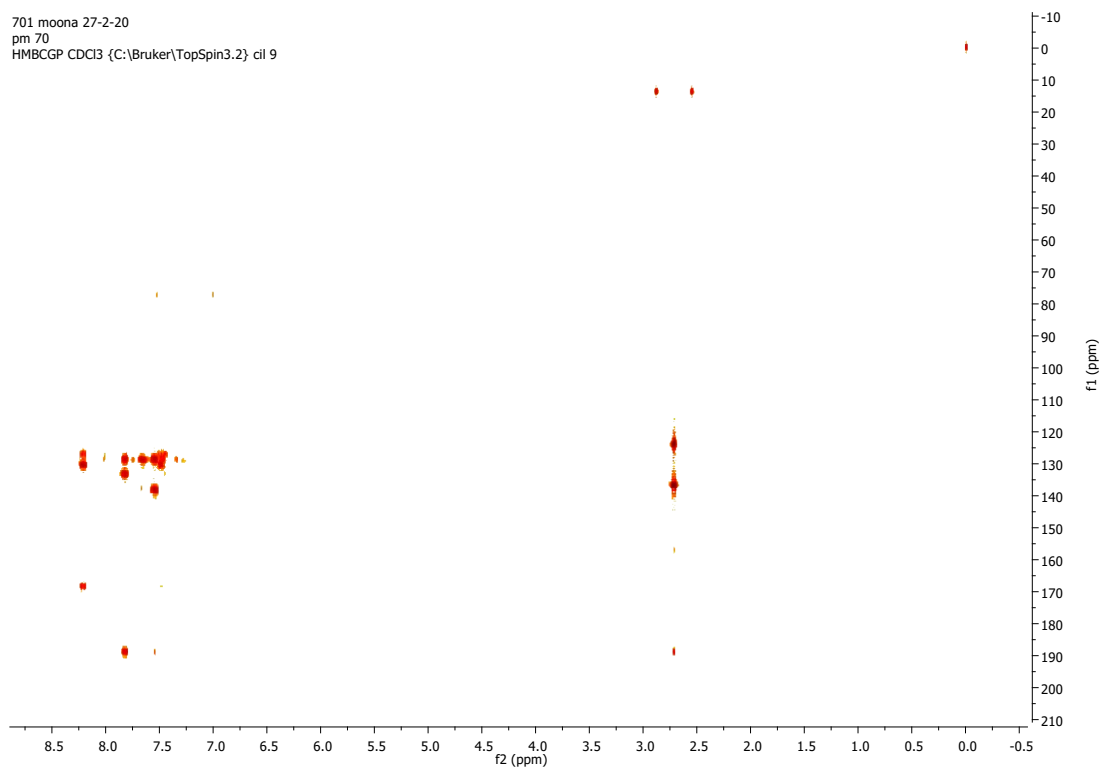

Figure S19b. HMBC of 6a



**Table S1.** NMR data in CDCl<sub>3</sub>, chemical shifts ( $\delta$ , ppm) and coupling constants ( $J$ , Hz) for compound **6a**

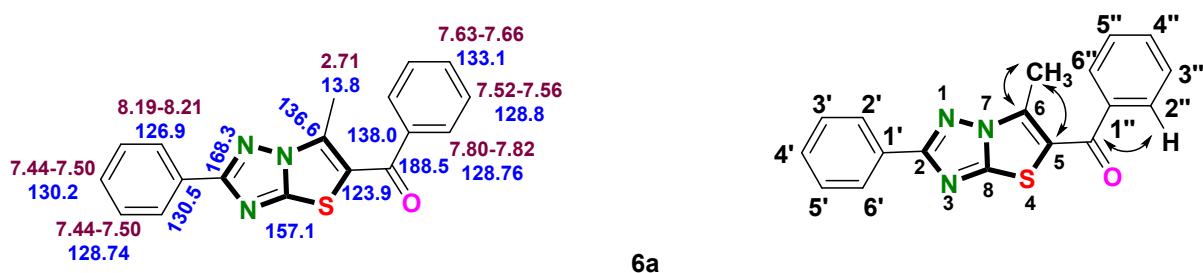

**6a**

| Chemical shifts<br>( $\delta$ in ppm) | gs-HMQC<br>correlation | gs-HMBC<br>correlation | Assignments |
|---------------------------------------|------------------------|------------------------|-------------|
| 188.5                                 | ---                    | 7.80-7.82 (H2''/H6'')  | CO          |
| 168.3                                 | ---                    | 8.19-8.21 (H2'/H6')    | C2          |
| 157.1                                 | ---                    | ---                    | C8          |
| 138.0                                 | ---                    | 7.52-7.56 (H3''/H5'')  | C1''        |
| 136.6                                 | ---                    | 2.71 (6-Me)            | C6          |
| 133.1                                 | 7.63-7.67 (H4'')       | 7.80-7.82 (H2''/H6'')  | C4''        |
| 130.5                                 | -                      | 7.44-7.50 (H4')        | C1'         |
|                                       |                        | 7.44-7.50 (H3'/H5')    |             |
| 130.2                                 | 7.44-7.50 (H4')        | 7.44-7.50 (H3'/H5')    | C4'         |
|                                       |                        | 8.19-8.21 (H2'/H6')    |             |
| 128.8                                 | 7.52-7.56 (H3''/H5'')  | 7.80-7.82 (H2''/H6'')  | C3''/C5''   |
| 128.76                                | 7.80-7.82 (H2''/H6'')  | 7.52-7.56 (H3''/H5'')  | C2''/C6''   |
|                                       |                        | 7.63-7.67 (H4'')       |             |
| 128.74                                | 7.44-7.50 (H3'/H5')    | 8.19-8.21 (H2'/H6')    | C3'/C5'     |
| 126.9                                 | 8.19-8.21 (H2'/H6')    | 7.44-7.50 (H3'/H5')    | C2'/C6'     |
| 123.9                                 |                        | 2.71 (6-Me)            | C5          |
| 13.8                                  | 2.71 (6-Me)            | 123.9 (C5)             | 6-Me        |
|                                       |                        | 136.6 (C6)             |             |

moona 26-2-20  
p m 738  
HSQC GP DMSO {C:\Bruker\TopSpin3.2} cil 1

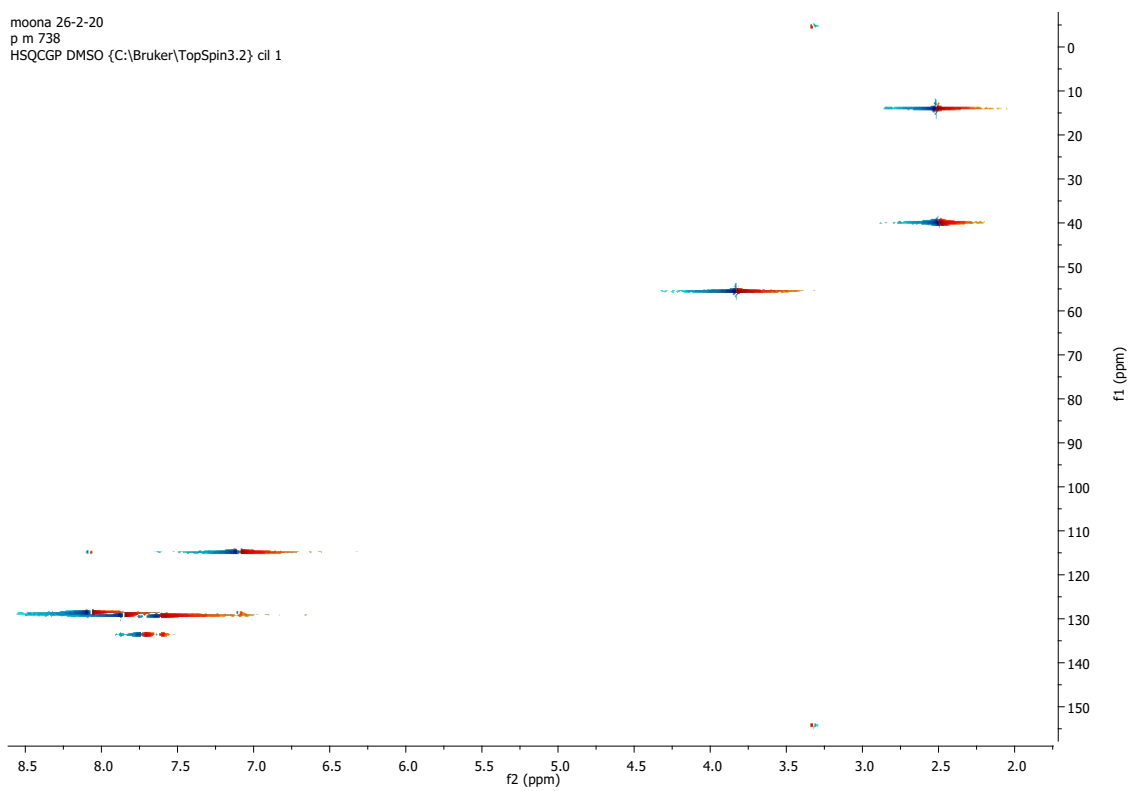

**Figure S20a. HMQC of 6j**

moona 26-2-20  
p m 738  
HMBC GP DMSO {C:\Bruker\TopSpin3.2} cil 1

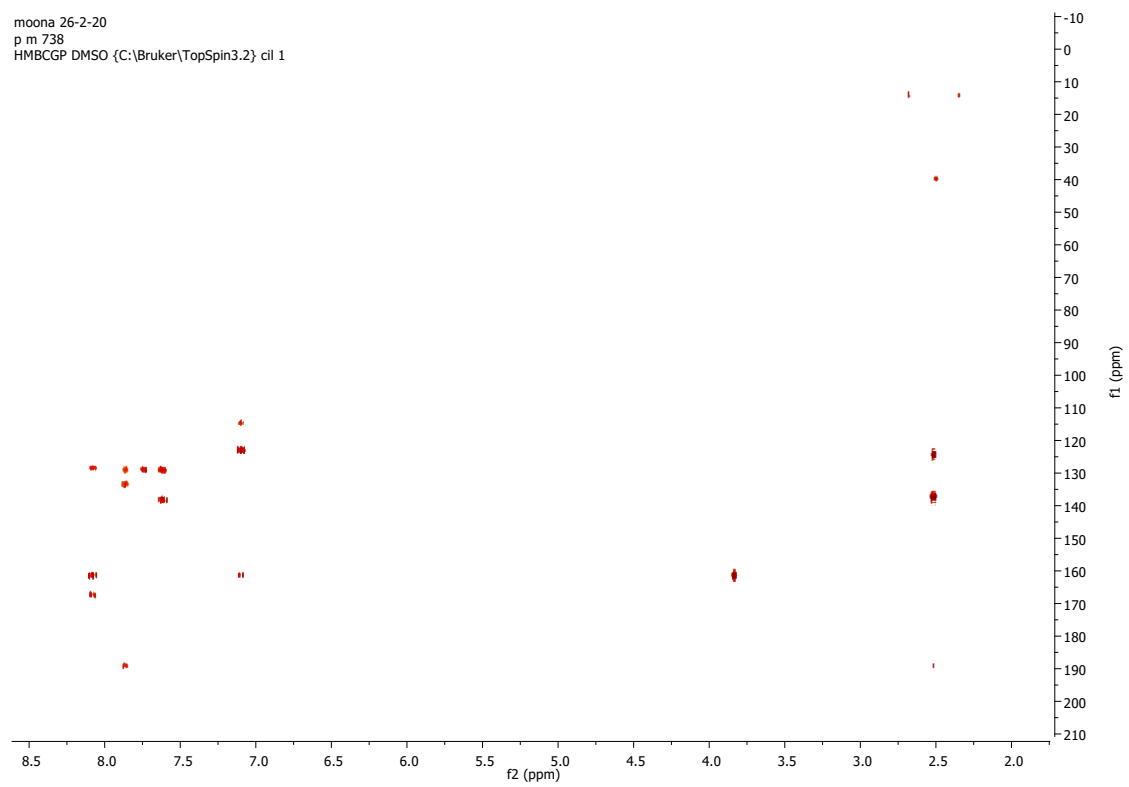

**Figure S20b. HMBC of 6j**

**Table S2.** NMR data in CDCl<sub>3</sub>, chemical shifts ( $\delta$ , ppm) and coupling constants ( $J$ , Hz) for compound **6j**

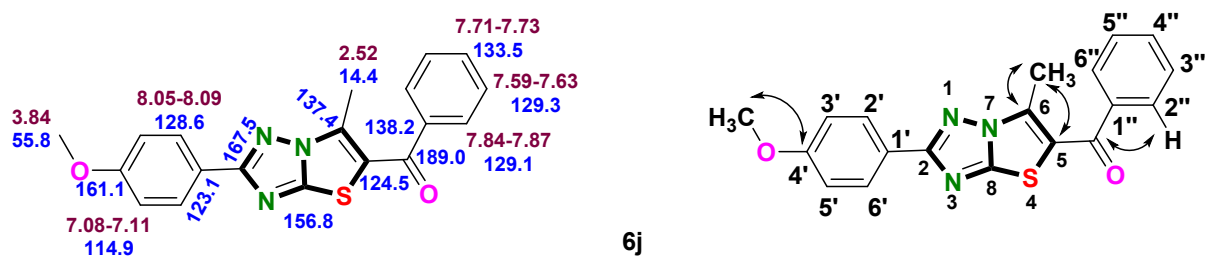

| Chemical shifts<br>( $\delta$ in ppm) | gs-HMQC<br>correlation | gs-HMBC<br>correlation                     | Assignments |
|---------------------------------------|------------------------|--------------------------------------------|-------------|
| 189.0                                 | ---                    | 7.84-7.87 (H2''/H6'')                      | CO          |
| 167.5                                 | ---                    | 8.05-8.09 (H2'/H6')                        | C2          |
| 161.1                                 | ---                    | 8.05-8.09 (H2'/H6')<br>7.08-7.11 (H3'/H5') | C4'         |
| 156.8                                 | ---                    | -                                          | C8          |
| 138.2                                 | ---                    | 7.59-7.63 (H3''/H5'')                      | C1''        |
| 137.4                                 |                        | 2.52 (6-Me)                                | C6          |
| 133.5                                 | 7.71-7.75 (H4'')       | 7.84-7.87 (H2''/H6'')                      | C4''        |
| 129.3                                 | 7.59-7.63 (H3''/H5'')  | 7.71-7.75 (H4'')<br>7.59-7.63 (H3''/H5'')  | C3''/C5''   |
| 129.1                                 | 7.84-7.87 (H2''/H6'')  | 7.59-7.63 (H3''/H5'')                      | C2''/C6''   |
| 128.6                                 | 8.05-8.09 (H2'/H6')    | -                                          | C2'/C6'     |
| 124.5                                 |                        | 2.52 (6-Me)                                | C5          |
| 123.1                                 |                        | 7.08-7.11 (H3'/H5')                        | C1'         |
| 114.9                                 | 7.08-7.11 (H3'/H5')    | -                                          | C3'/C5'     |
| 55.8                                  | 3.83 (4-OMePh)         | 161.1 (C4')                                | 4-OMePh     |
| 14.4                                  | 2.52 (6-Me)            | 124.5 (C5)<br>137.4 (C6)                   | 6-Me        |

## HRMS

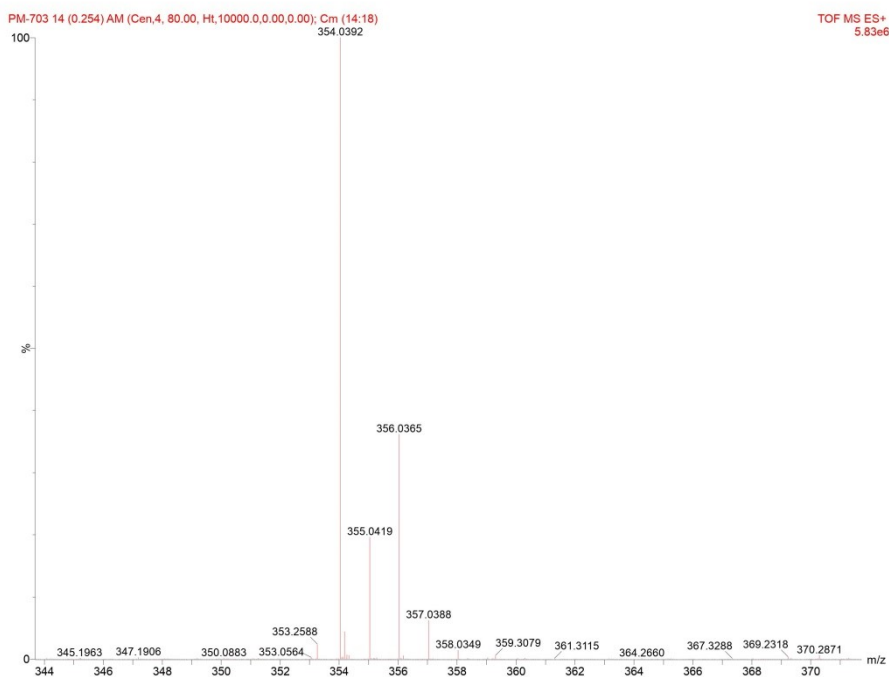

**Figure S21.** HRMS of *(4-chlorophenyl)(6-methyl-2-phenylthiazolo[3,2-b][1,2,4]triazol-5-yl)methanone (6c)*

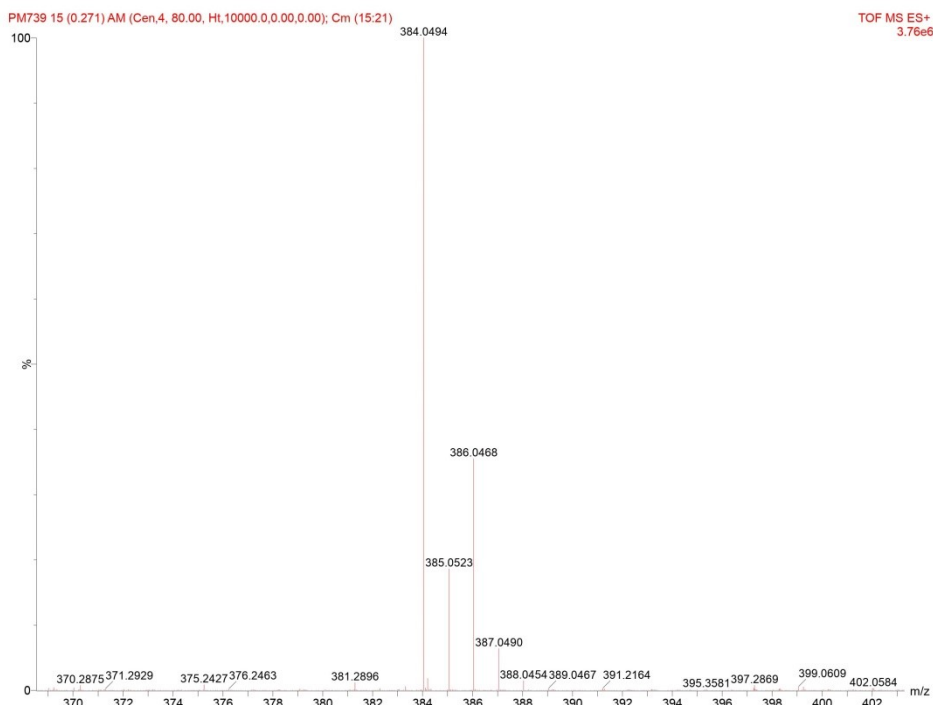

**Figure S22.** HRMS of *(4-chlorophenyl)(2-(4-methoxyphenyl)-6-methylthiazolo[3,2-b][1,2,4]triazol-5-yl)methanone (6l)*

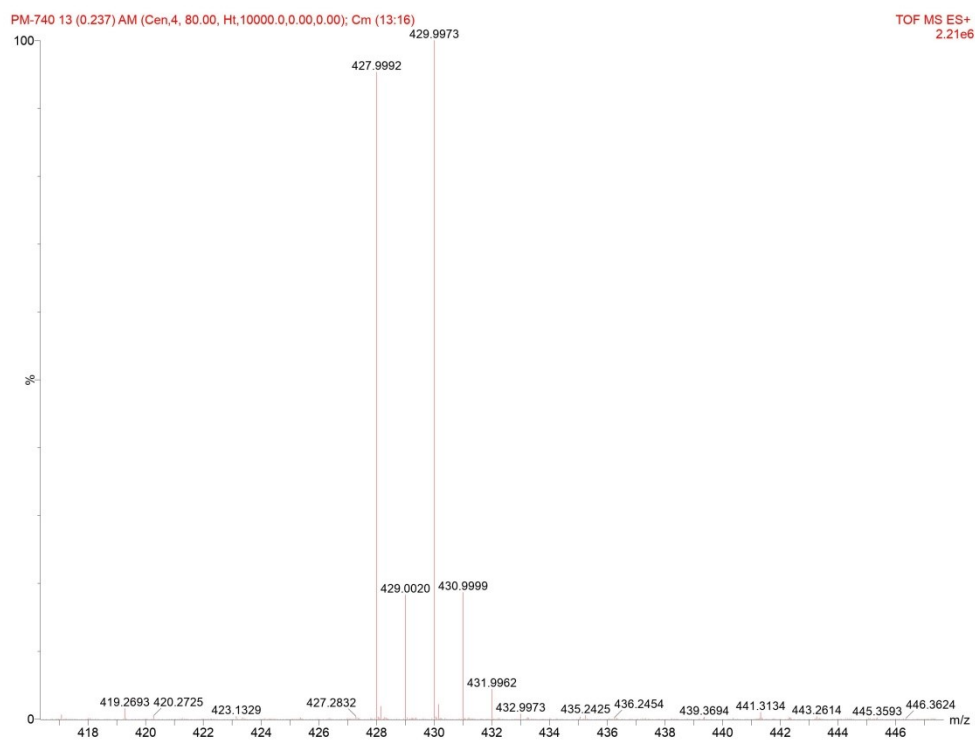

**Figure S22.** HRMS of *(4-bromophenyl)(2-(4-methoxyphenyl)-6-methylthiazolo[3,2-b][1,2,4]triazol-5-yl)methanone (6m)*

### X-ray Crystallographic Data for 6j

**Table S3. Bond Lengths for 6j.**

| Atom | Atom | Length/Å   | Atom | Atom | Length/Å |
|------|------|------------|------|------|----------|
| S4   | C8   | 1.7226(19) | C5   | C9   | 1.464(3) |
| S4   | C5   | 1.7804(17) | C5   | C6   | 1.349(3) |
| N7   | C8   | 1.339(2)   | C19  | C18  | 1.388(3) |
| N7   | C6   | 1.387(2)   | C19  | C20  | 1.387(3) |
| N7   | N1   | 1.370(2)   | C9   | C10  | 1.488(3) |
| O2   | C19  | 1.363(2)   | C2   | N1   | 1.329(2) |
| O2   | C22  | 1.417(3)   | C6   | C23  | 1.433(2) |
| N3   | C8   | 1.313(2)   | C15  | C10  | 1.388(3) |
| N3   | C2   | 1.375(2)   | C15  | C14  | 1.378(3) |
| C16  | C21  | 1.387(3)   | C18  | C17  | 1.376(3) |
| C16  | C2   | 1.469(3)   | C10  | C11  | 1.390(3) |
| C16  | C17  | 1.393(3)   | C11  | C12  | 1.382(3) |
| O1   | C9   | 1.220(2)   | C12  | C13  | 1.373(4) |
| C21  | C20  | 1.390(3)   | C13  | C14  | 1.377(3) |

**Table S4. Bond Angles for 6j.**

| Atom | Atom | Atom | Angle/°    | Atom | Atom | Atom | Angle/°    |
|------|------|------|------------|------|------|------|------------|
| C8   | S4   | C5   | 89.25(8)   | O1   | C9   | C10  | 120.35(17) |
| C8   | N7   | C6   | 117.73(15) | C5   | C9   | C10  | 121.00(15) |
| C8   | N7   | N1   | 110.80(14) | N3   | C2   | C16  | 122.42(16) |
| N1   | N7   | C6   | 131.46(14) | N1   | C2   | N3   | 116.14(16) |
| C19  | O2   | C22  | 118.21(16) | N1   | C2   | C16  | 121.44(17) |
| C8   | N3   | C2   | 101.75(15) | N7   | C6   | C23  | 117.88(15) |
| N7   | C8   | S4   | 110.61(13) | C5   | C6   | N7   | 109.45(15) |
| N3   | C8   | S4   | 138.46(14) | C5   | C6   | C23  | 132.62(16) |
| N3   | C8   | N7   | 110.93(16) | C14  | C15  | C10  | 119.72(19) |

|     |     |     |            |     |     |     |            |
|-----|-----|-----|------------|-----|-----|-----|------------|
| C21 | C16 | C2  | 121.46(16) | C17 | C18 | C19 | 120.98(17) |
| C21 | C16 | C17 | 118.38(17) | C15 | C10 | C9  | 121.49(17) |
| C17 | C16 | C2  | 120.15(18) | C15 | C10 | C11 | 119.56(18) |
| C16 | C21 | C20 | 121.58(17) | C11 | C10 | C9  | 118.80(17) |
| C9  | C5  | S4  | 114.59(13) | C19 | C20 | C21 | 119.28(19) |
| C6  | C5  | S4  | 112.93(13) | C12 | C11 | C10 | 120.0(2)   |
| C6  | C5  | C9  | 132.37(16) | C18 | C17 | C16 | 120.38(19) |
| O2  | C19 | C18 | 115.90(16) | C13 | C12 | C11 | 120.0(2)   |
| O2  | C19 | C20 | 124.69(19) | C12 | C13 | C14 | 120.2(2)   |
| C20 | C19 | C18 | 119.41(17) | C13 | C14 | C15 | 120.5(2)   |
| O1  | C9  | C5  | 118.63(17) | C2  | N1  | N7  | 100.38(14) |
